# Supplementary material for: Telomere DNA length regulation is influenced by seasonal temperature differences in short-lived but not in long-lived reef-building corals
Source: PubMed Central journal article supplement (PMC10235076; doi:10.1038/s41467-023-38499-1), 2023-06-01
Supplement: 41467_2023_38499_MOESM1_ESM.pdf [file 41467_2023_38499_MOESM1_ESM.pdf]

## Supplementary information

### Telomere DNA length regulation is influenced by seasonal temperatures differences

#### in short-lived but not in long-lived reef-building corals

Alice Rouan<sup>1,3\*</sup>, Melanie Pousse<sup>1-3\*</sup>, Nadir Djerbi<sup>1-3\*</sup>, Barbara Porro<sup>1-3</sup>, Guillaume Bourdin<sup>4</sup>, Quentin Carradec<sup>5,6</sup>, Benjamin C Hume<sup>7</sup>, Julie Poulain<sup>5,6</sup>, Julie Lê-Hoang<sup>5,6</sup>, Eric Armstrong<sup>5,6</sup>, Sylvain Agostini<sup>8</sup>, Guillem Salazar<sup>9</sup>, Hans-Joachim Ruscheweyh<sup>9</sup>, Jean-Marc Aury<sup>5</sup>, David A. Paz-García<sup>10</sup>, Ryan McMinds<sup>1,11</sup>, Marie-Josèphe Giraud-Panis<sup>1-3</sup>, Romane Deshuraud<sup>1-3</sup>, Alexandre Ottaviani<sup>1-3</sup>, Lycia Die Morini<sup>1</sup>, Camille Leone<sup>1</sup>, Lia Wurzer<sup>1</sup>, Jessica Tran<sup>1</sup>, Didier Zoccola<sup>12,3</sup>, Alexis Pey<sup>1-3</sup>, Clémentine Moulin<sup>13</sup>, Emilie Boissin<sup>14</sup>, Guillaume Iwankow<sup>14</sup>, Sarah Romac<sup>14</sup>, Colomban de Vargas<sup>15,6</sup>, Bernard Banaigs<sup>14</sup>, Emmanuel Boss<sup>4</sup>, Chris Bowler<sup>16</sup>, Eric Douville<sup>17</sup>, Michel Flores<sup>18</sup>, Stéphanie Reynaud<sup>12,3</sup>, Olivier P. Thomas<sup>19</sup>, Romain Troublé<sup>13</sup>, Rebecca Vega Thurber<sup>20</sup>, Serge Planes<sup>14</sup>, Denis Allemand<sup>12,3</sup>, Stephane Pesant<sup>21</sup>, Pierre E. Galand<sup>22</sup>, Patrick Wincker<sup>5,6</sup>, Shinichi Sunagawa<sup>9</sup>, Eric Röttinger<sup>1-3</sup>, Paola Furla<sup>1-3</sup>, Christian R Voolstra<sup>7</sup>, Didier Forcioli<sup>1-3</sup>, Fabien Lombard<sup>23</sup> and Eric Gilson<sup>1-3,24</sup>

1 Université Côte d'Azur-CNRS- Inserm - Institute for Research on Cancer and Ageing, Nice (IRCAN), France.

2 Université Côte d'Azur, Institut Fédératif de Recherche - Ressources Marines (IFR MARRES)

3 Laboratoire International Associé Université Côte d'Azur - Centre Scientifique de Monaco (LIA ROPSE), France, Monaco.

4 School of Marine Sciences, University of Maine, Orono, Maine, United States of America

5 Génomique Métabolique, Genoscope, Institut François Jacob, CEA, CNRS, Univ Evry, Université Paris-Saclay, 91057, Evry, France.

6 Research Federation for the Study of Global Ocean Systems Ecology and Evolution, R2022/Tara Oceans GO-SEE, 75016, Paris, France.

7 Department of Biology, University of Konstanz, Konstanz, Germany

8 Shimoda Marine Research Center, University of Tsukuba, Shimoda, Japan.

9 Department of Biology, Institute of Microbiology and Swiss Institute of Bioinformatics, ETH Zurich, 8092 Zurich, Switzerland

10 CONAyT-Centro de Investigaciones Biológicas del Noroeste (CIBNOR), Laboratorio de Necton y Ecología de Arrecifes, La Paz, Baja California Sur 23096, México.

11 University of South Florida Center for Global Health and Infectious Diseases Research, Tampa, FL, United States

12 Centre Scientifique de Monaco, Principality of Monaco

13 Tara Ocean Foundation, 8 rue de Prague, 75012 Paris, France.

14 Laboratoire d'Excellence "CORAIL," PSL Research University: EPHE-UPVD-CNRS, USR 3278 CRIOBE, Université de Perpignan, Perpignan Cedex, France.

15 Sorbonne Université, CNRS, Station Biologique de Roscoff, AD2M, UMR 7144, ECOMAP, Roscoff, France.

16 Institut de Biologie de l'Ecole Normale Supérieure (IBENS), Ecole normale supérieure, CNRS, INSERM, Université PSL, 75005 Paris, France

17 Laboratoire des Sciences du Climat et de l'Environnement, LSCE/IPSL, CEA-CNRS-UVSQ, Université Paris-Saclay, F-91191 Gif-sur-Yvette, France

18 Weizmann Institute of Science, Department of Earth, and Planetary Sciences, 76100 Rehovot, Israel

19 School of Biological and Chemical Sciences, Ryan Institute, University of Galway, University Road H91TK33 Galway, Ireland

20 Oregon State University, Department of Microbiology, 220 Nash Hall, 97331 Corvallis OR USA

21 PANGEA, Data Publisher for Earth and Environment Science, Bremen, Germany,

22 Sorbonne Université, CNRS, Laboratoire d'Ecogéochimie des Environnements Benthiques, Observatoire Océanologique de Banyuls, Banyuls-sur-Mer, France

23 Sorbonne Université, Institut de la Mer de Villefranche sur mer, Laboratoire d'Océanographie de Villefranche, Villefranche-sur-Mer, France.

24 Department of Medical Genetics, CHU, Nice, France.

\* Contributed equally

✉ [Eric.Gilson@univ-cotedazur.fr](mailto:Eric.Gilson@univ-cotedazur.fr); [Alice.Rouan@outlook.fr](mailto:Alice.Rouan@outlook.fr)

**This pdf contains Supplementary Figure 1-13 and Supplementary Tables 1-6.**

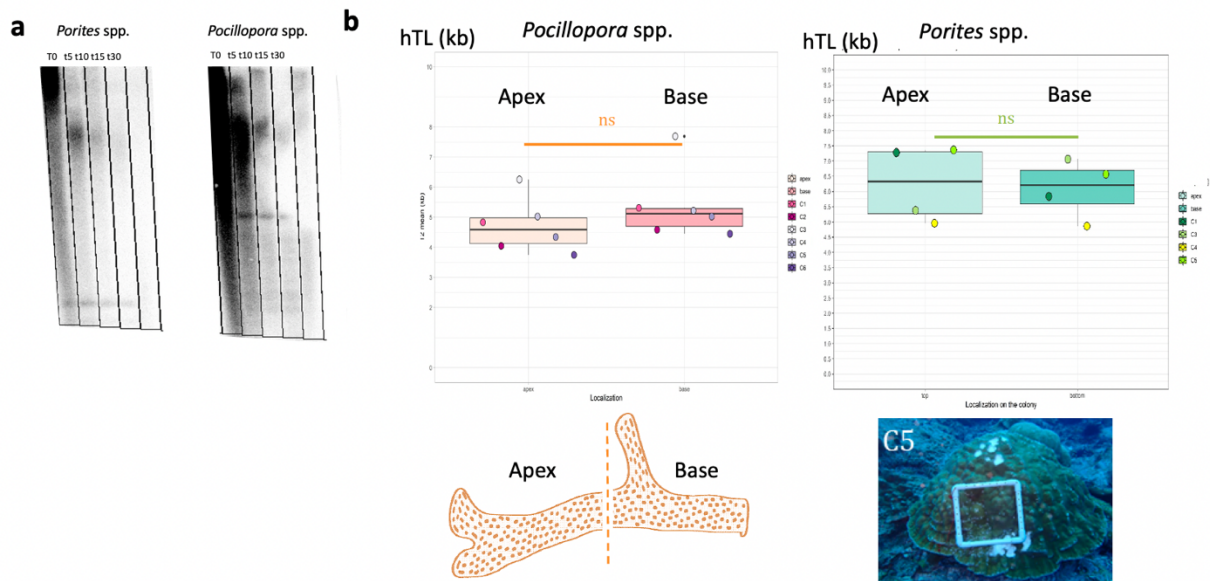

**Supplementary Figure 1: Controls of TL measurement in coral.**

**a)** Bal31 Telomere restriction fragment assay. For each lane 5µg of DNA was digested by the exonuclease Bal31 for (t0, 5, 10, 15 and 30 minutes). The reactions were then digested by *RsaI* and *HinfI* to perform the Southern blotting TRF analyses. Results show a decrease in the hTL smear with the increase of incubation time with Bal31 while the discrete band (Interstitial Telomeric Sequence) remains, showing that the smear signal is terminally located.

**b)** Boxplot of mean host TL measures (mean hTL) in 2 different localizations (apex or top of a branch/colony compared to base or edge of a branch/colony) of *Pocillopora* spp. and *Porites* spp. colonies. The colonies were sampled at the Clipperton island. The lower and upper bounds of the box represent the first (Q1) and the third (Q3) quartile, respectively. The entire box represents the interquartile range (IQ). The median is represented as a line across the box. Whiskers extending from Q1 and Q3 are defined as 1.5xIQ. The right box displays the colony part localized at the apex of a branch (*Pocillopora* spp.) or the top of the colony (*Porites* spp.). The right box displays the colony part localized at the base of a branch (*Pocillopora* spp.) or the edge of the colony (*Porites* spp.). Samples are colored by colony (6 colonies for *Pocillopora* spp. and 4 colonies *Porites* spp.) and displayed as dots. Apex and base groups were compared using the Wilcoxon nonparametric test (absence of normal distribution of data) (ns= not significant, pvalue=0.1797 and pvalue=0.4557 respectively). The scheme of the experimental design of branch sectioning is shown below the *Pocillopora* spp hTL results and a picture showing the apex and base sampling of a *Porites* spp colony is found below the *Porites* spp hTL results.

Source data are provided as a Source Data file.

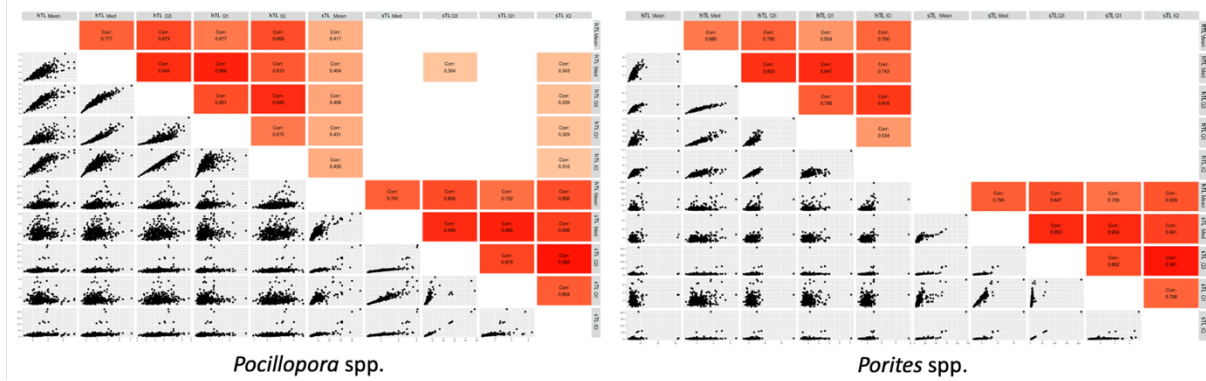

### Supplementary Figure 2: Correlation among TL parameters

Correlation matrix between TL (hTL and sTL: mean, median, Q1: 1st quartile, Q3: 3rd quartile, IQ: interquartile distance) in *Pocillopora* and *Porites* samples with the distribution plots in the left half and significant correlation coefficient  $s$  ( $r_s > 0.3$ ,  $p < 0.05$ ) in the right half ( $n = 363$  samples).

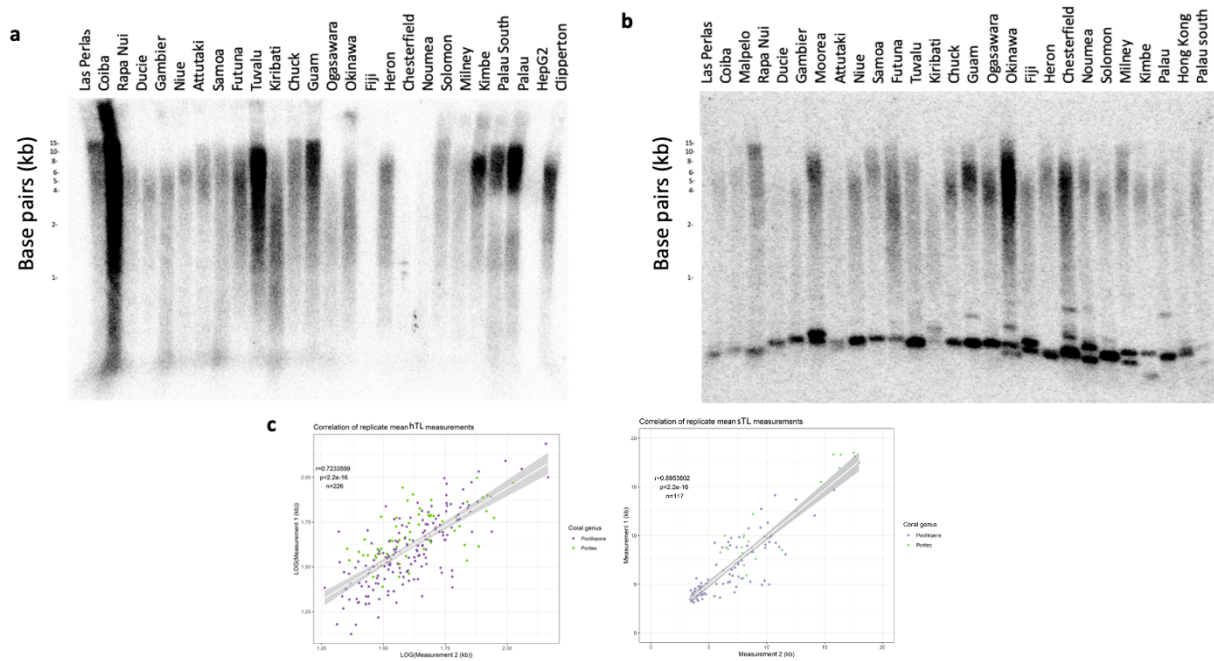

### Supplementary Figure 3: Southern control quality

**a-b)** Examples of Telomere Restriction Fragment (TRF) Southern blotting of *Pocillopora* spp. samples (left) and *Porites* spp. samples (right) hybridized with the radioactive labelled complementary probe to the host telomeric repeat sequence (hTL). The lane names are referring to the sampling island of the samples for *Pocillopora* spp. (blot #150120, samples names are displayed from left to right, M011C06, M021C10, M044C10, M053C10, M063C06, M091C04, M081C01, M102C06, M111C10, M122C01, M131C06, M142C01, M152C10, M163C10, M171C06, M183C07, M193C10, M202C10, M213C01, M223C10, M231C01, M241C01, M252C05, M261C01, HepG2 (human cells), M313C01) and *Porites* spp. (blot #080419, samples names are displayed from left to right, L012C16, L022C13, L031C04, L043C16, L051C16, L061C11, L071C16, L081C11, L093C16, L102C12, L113C11, L123C19, L141C16, L153C11, L163C16, L171C12, L182C16, L191C11, L201C15, L213C11, L222C11, L231C11, L243C11, L263C12, L272C11, L251C13)

**c)** Correlation analyses between technical replicates of TRF duplicated results for samples loaded at least twice in separate gels. The samples are displayed as dots and colored by genus (*Pocillopora* spp. in purple and *Porites* spp. in green) for mean hTL results on the left and mean sTL on the right. A smoothed linear regression curved is plot as a white line with a grey confidence interval. The hTL (left) data were log transformed, not the sTL (right), to perform a Pearson's correlation test between the technical duplicates ( $r=0.7233599$ ,  $pvalue<2.2e^{-16}$  and  $r=0.8953802$ ,  $pvalue<2.2e^{-16}$ , respectively),  $n$  indicates the number of samples.

Source data are provided as a Source Data file, including detailed information of all the blots used in the study to measure TL.



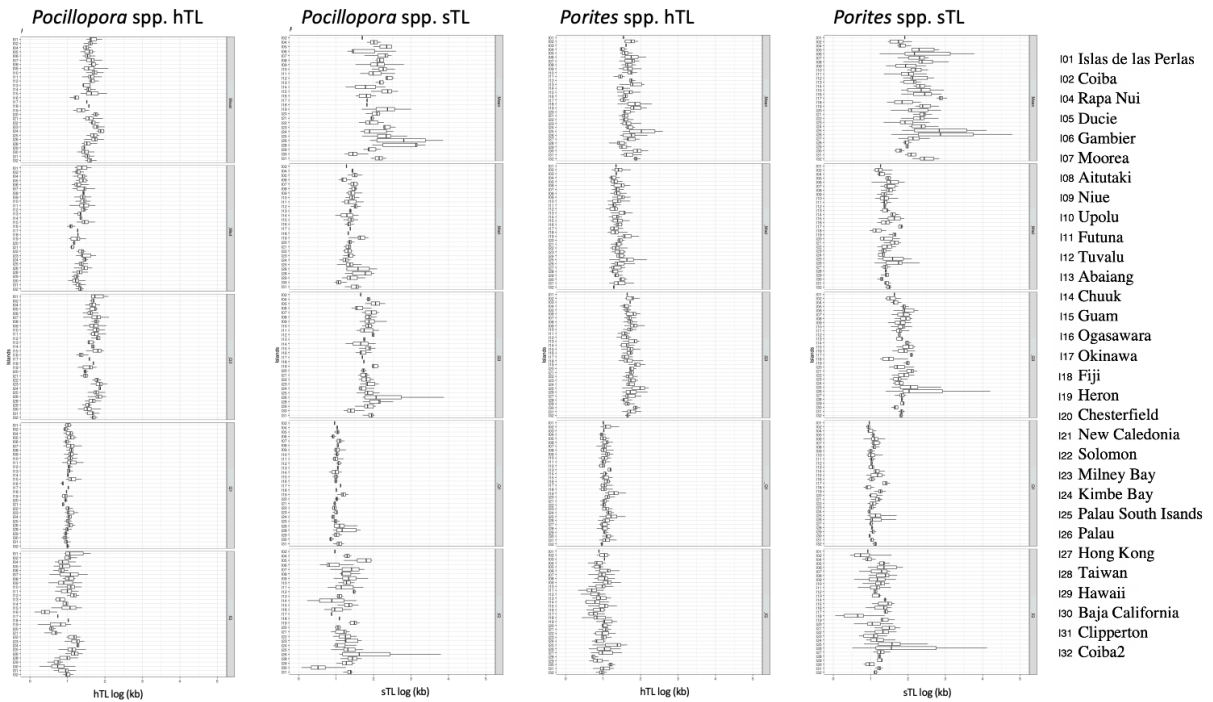

#### Supplementary Figure 4: Results of TL measurement

Boxplot of coral TLs analyzed in 32 islands of the Pacific Ocean. The various TL parameters analyzed by Southern blotting are shown (n = 444 samples (*Pocillopora* hTL), n = 363 samples (*Pocillopora* sTL), n = 409 samples (*Porites* hTL), n = 341 samples (*Porites* sTL)). The boxplots are defined as follows: the lower and upper bounds of the box represent the first (Q1) and the third (Q3) quartile, respectively. The entire box represents the interquartile range (IQ). The median is represented as a line across the box. Whiskers extending from Q1 and Q3 are defined as 1.5xIQ.

Source data are provided as a Source Data file.

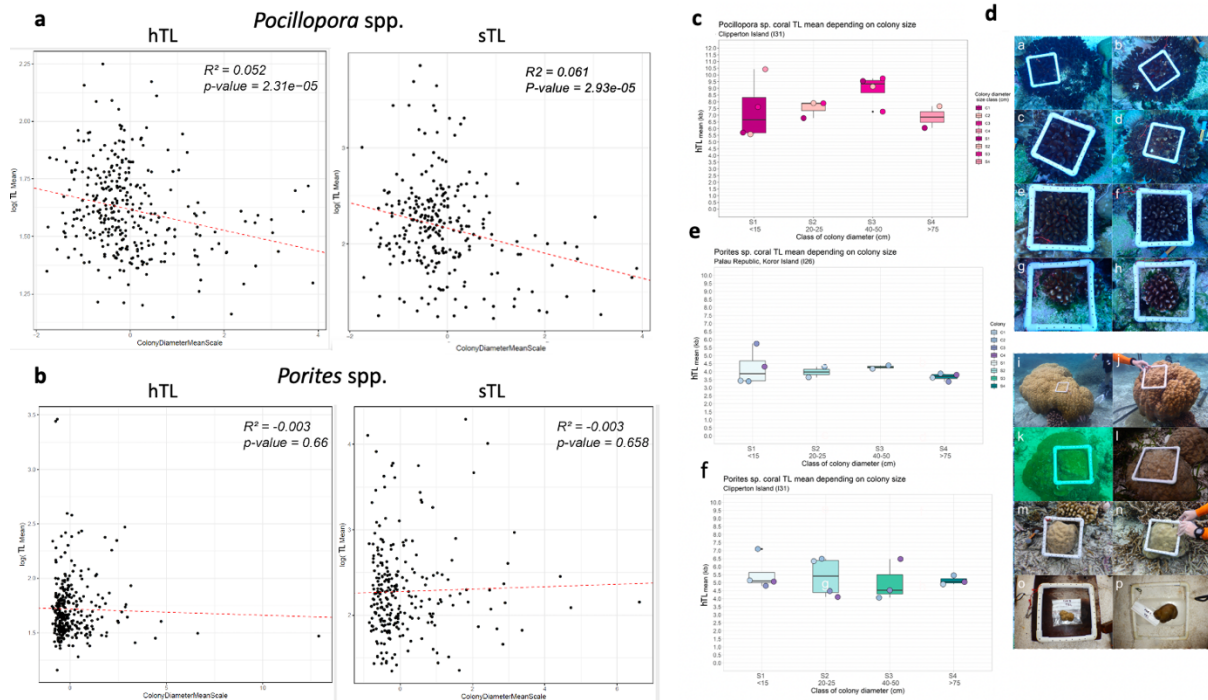

### Supplementary Figure 5: TL and colony size

**a-b)** Log(TL) as a function of Colony diameter mean (scaled: centered and reduced) in *Pocillopora* (a) and *Porites* (b). The red dashed line is extracted from the linear model  $\log(\text{TL}) \sim \text{Colony diameter mean}$ . The p-value is obtained using a F-test on the linear model. **c)** Boxplot of mean hTL differences between *Pocillopora* of 4 different size classes from Clipperton Island (Colony diameter: S1 < 15 cm, cm 20 < S2 < 25 cm, cm 40 < S3 < 50 cm, S4 > 75 cm). **d)** Pictures of colonies of different sizes of *Pocillopora* spp. from Clipperton (a-h) and *Porites* spp. from Palau (i-p). Two colonies per size class are displayed ((a-b;i-j) = S4, (c-d;k-l) = S3, (e-f;m-n) = S2, (g-h;o-p) = S1). **e-f)** Boxplot of mean hTL differences between *Porites* samples of 4 different size classes from Palau and Clipperton (Colony diameter: S1 < 15 cm, cm 20 < S2 < 25 cm, cm 40 < S3 < 50 cm, S4 > 75 cm). For **c-e-f)** the lower and upper bounds of the box represent the first (Q1) and the third (Q3) quartile, respectively. The entire box represents the interquartile range (IQ). The median is represented as a line across the box. Whiskers extending from Q1 and Q3 are defined as  $1.5 \times \text{IQ}$ . Each individual sample is displayed as a dot on top of the box. TL was not significantly different between size group (Kruskal-Wallis test : (c)  $p = 0.4286$ , (e)  $p = 0.7748$ , (f)  $p = 0.4448$ ).

Source data are provided as a Source Data file.

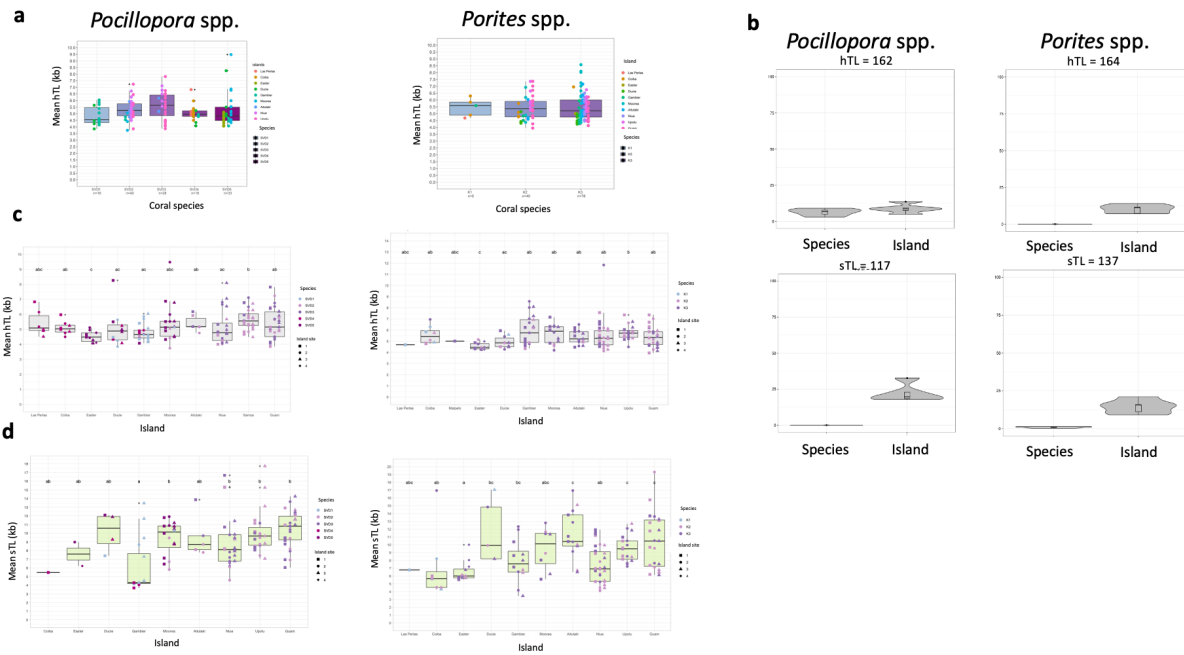

### Supplementary Figure 6: Species effect on TL variation

Box plot of mean hTL depending on genetic lineage for 11 islands across the Pacific Ocean. Individuals are colored by island. There are no significant differences neither for *Pocillopora* spp. (left) nor *Porites* spp. (right) (respectively  $0.082 < p < 0.476$  and  $p=0.93$ ). Genetic clusters are equivalent to species and n refers to the number of samples. **b**) Percentage of TL variation explained by the island of origin and host species for 11 islands across the Pacific Ocean. In this analysis, hTL/sTL mean, median, Q1, Q3 and IQ were used. n refers to the number of samples. **c-d**) Box plots of mean hTL and sTL depending on islands of origin for 11 islands for which the host species (genetic cluster) was determined. Individuals are colored by host species. Statistics in **a**, **c** and **d** are calculated using a pairwise wilcoxon test and are displayed as letters for **c** and **d**. Islands sharing at least one letter are not significantly different from each other. For all the boxplots, the lower and upper bounds of the box represent the first (Q1) and the third (Q3) quartile, respectively. The entire box represents the interquartile range (IQ). The median is represented as a line across the box. Whiskers extending from Q1 and Q3 are defined as  $1.5 \times IQ$ . Each individual sample is displayed as a dot on top of the box. Source data are provided as a Source Data file.

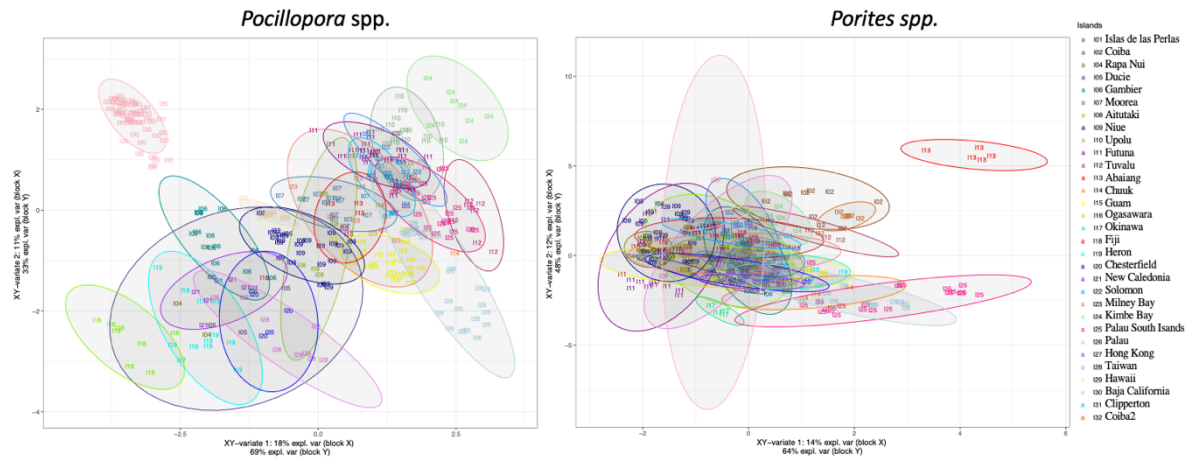

### Supplementary Figure 7: sPLS model between TL and environmental variables

Sample plot generated using the *plotIndiv* function corresponding to the sPLS model representing the relationship between hTL and environmental variables. Samples are labelled according to their island of origin.

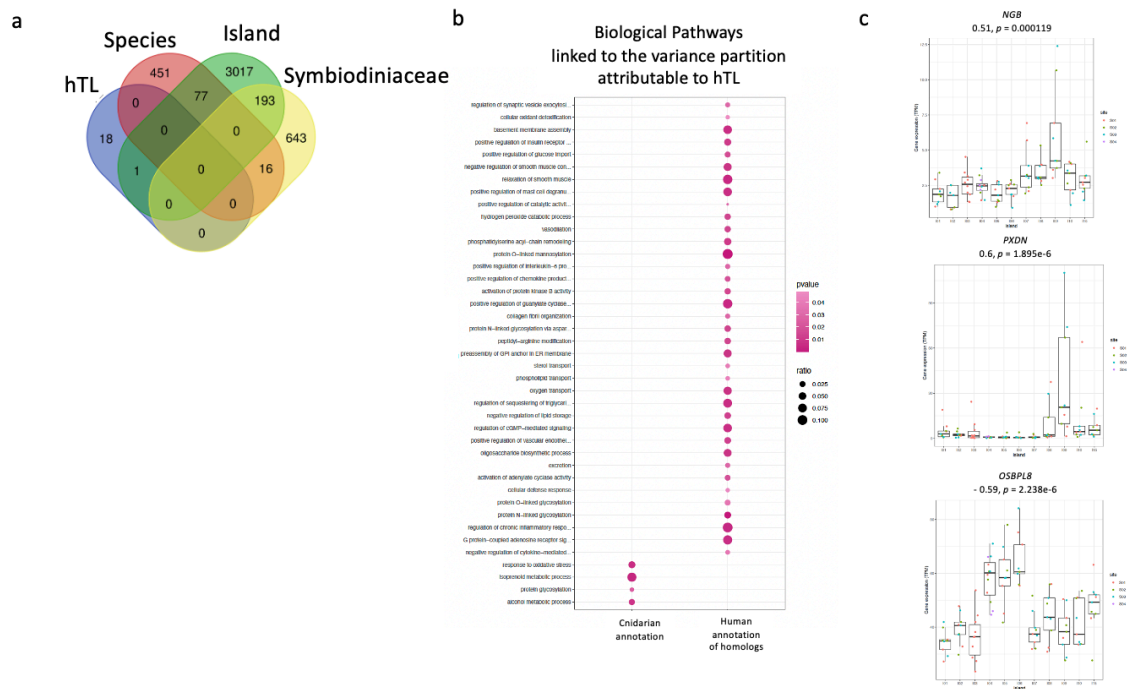

### Supplementary Figure 8: Characterization of the expression of hTL-correlated genes

a) Venn diagram of the hTL-correlated genes for which more than 25% of the variation in their expression is explained by one of four predictor variables: the island of origin, the host species (shown as “species”), the Symbiodiniaceae composition and hTL.

b) Functional enrichment analysis of the genes with expression variations explained by hTL. p-value of the Fisher’s exact test is given as a color gradient.

c) Expression by island of three genes correlated to hTL and involved in redox functions ( $n = 103$  samples). Correlation values from Spearman correlation and adjusted p-value using Benjamini–Hochberg method are given. The boxplots are defined as follows: the lower and upper bounds of the box represent the first (Q1) and the third (Q3) quartile, respectively. The entire box represents the interquartile range (IQ). The median is represented as a line across the box. Whiskers extending from Q1 and Q3 are defined as  $1.5 \times IQ$ . Source data are provided as a Source Data file.

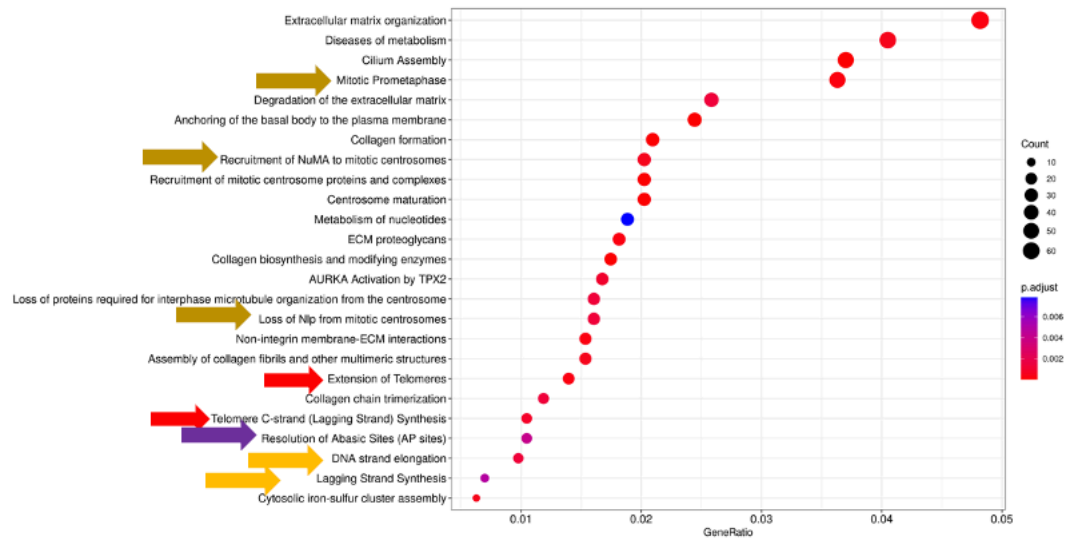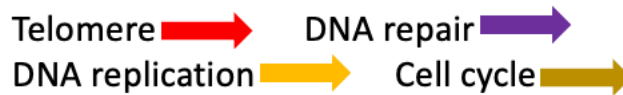

### Supplementary Figure 9: Reactome analysis of the expression of hTL-correlated genes

Significant pathways (adjusted p-value < 0.05, hypergeometric test, FDR adjustment) from Reactome analysis of the human homologs of the hTL-correlated genes for which at least 25% of their expression variance is explained by the island of origin (see **Fig. 4a**). Terms and pathways related to telomeres, DNA repair, DNA replication and cell cycle are represented by colored arrows.



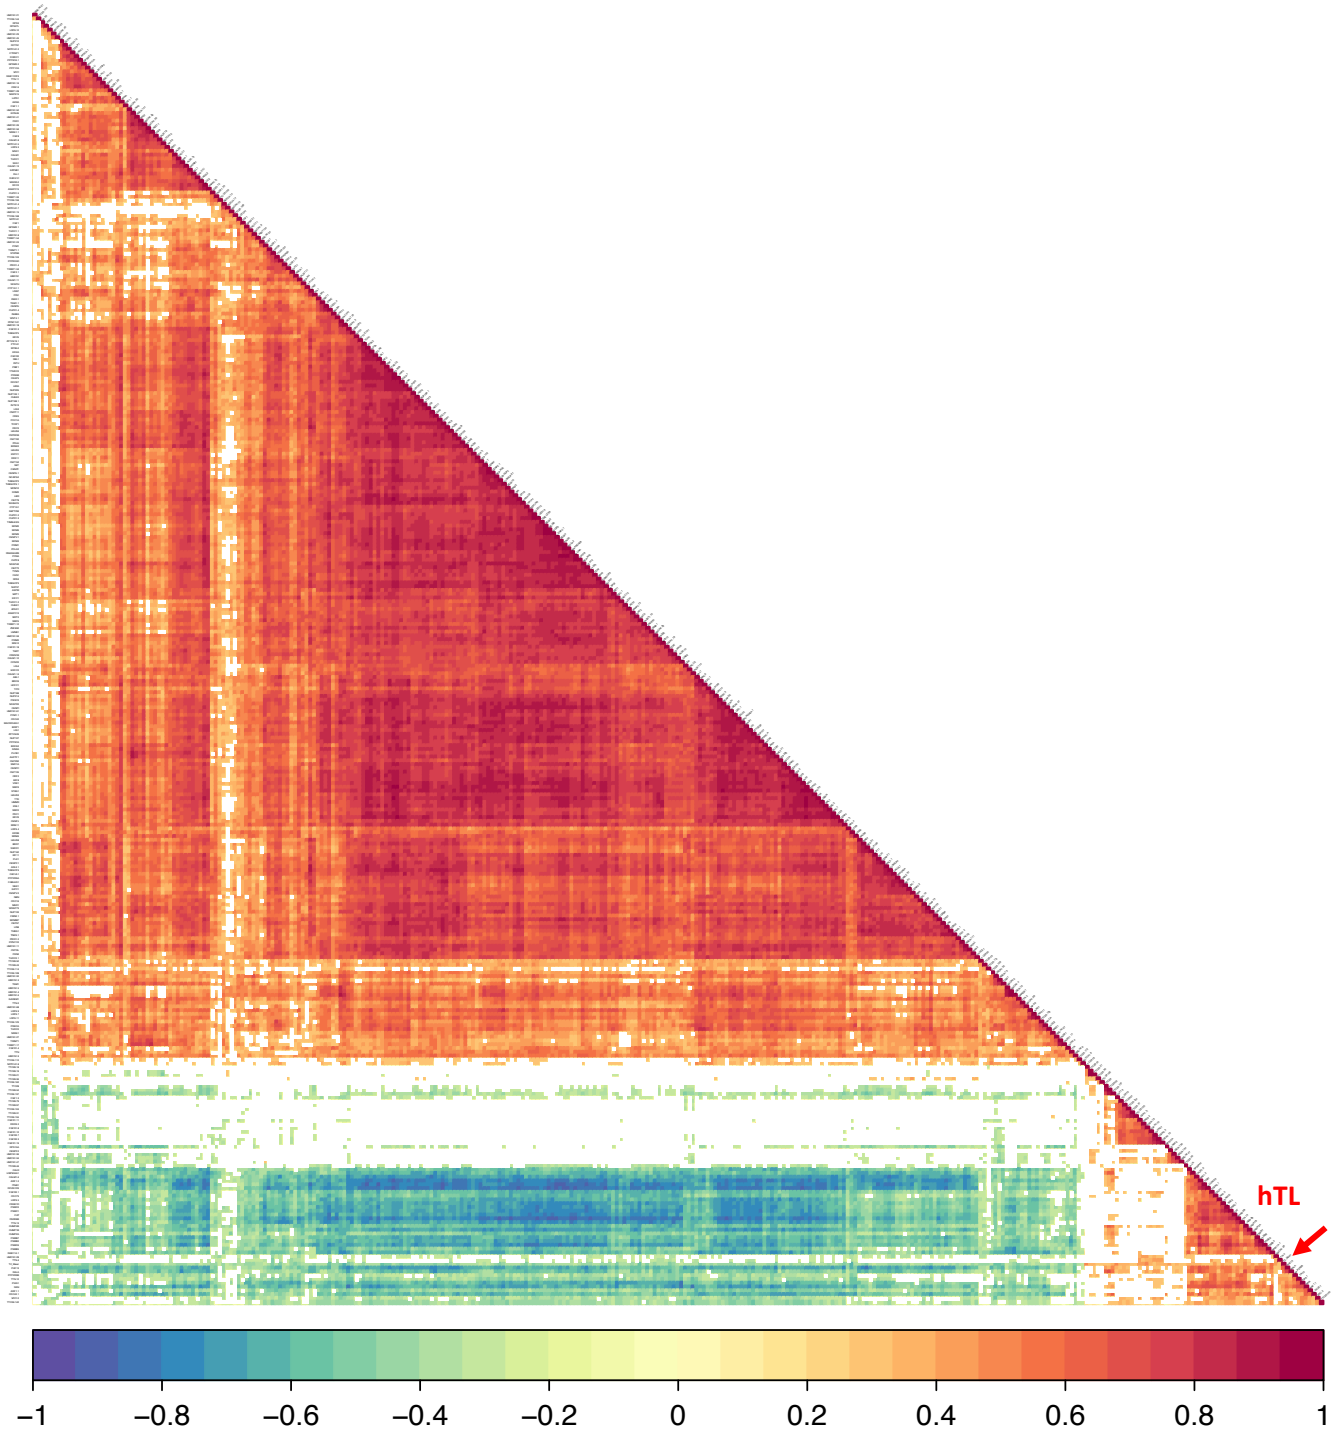

**Cell cycle genes whose expression variance  
is explained by islands and correlated with hTL**

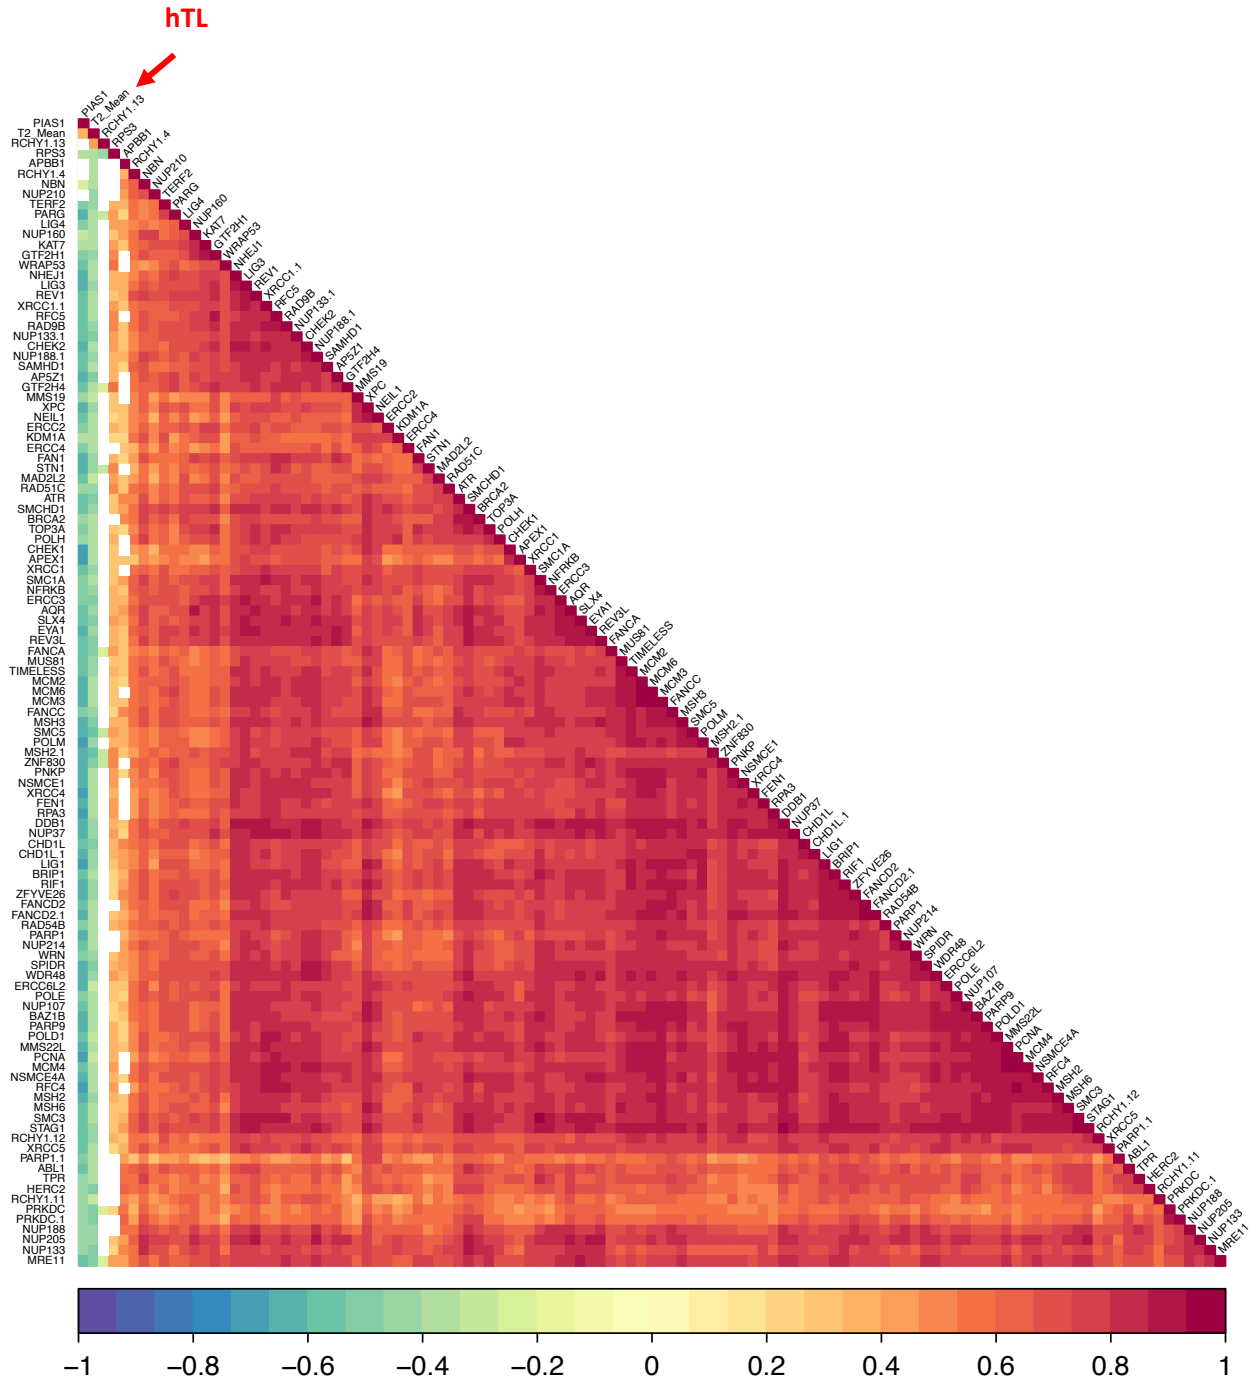

**DNA repair genes** whose expression variance is explained by islands and correlated with hTL

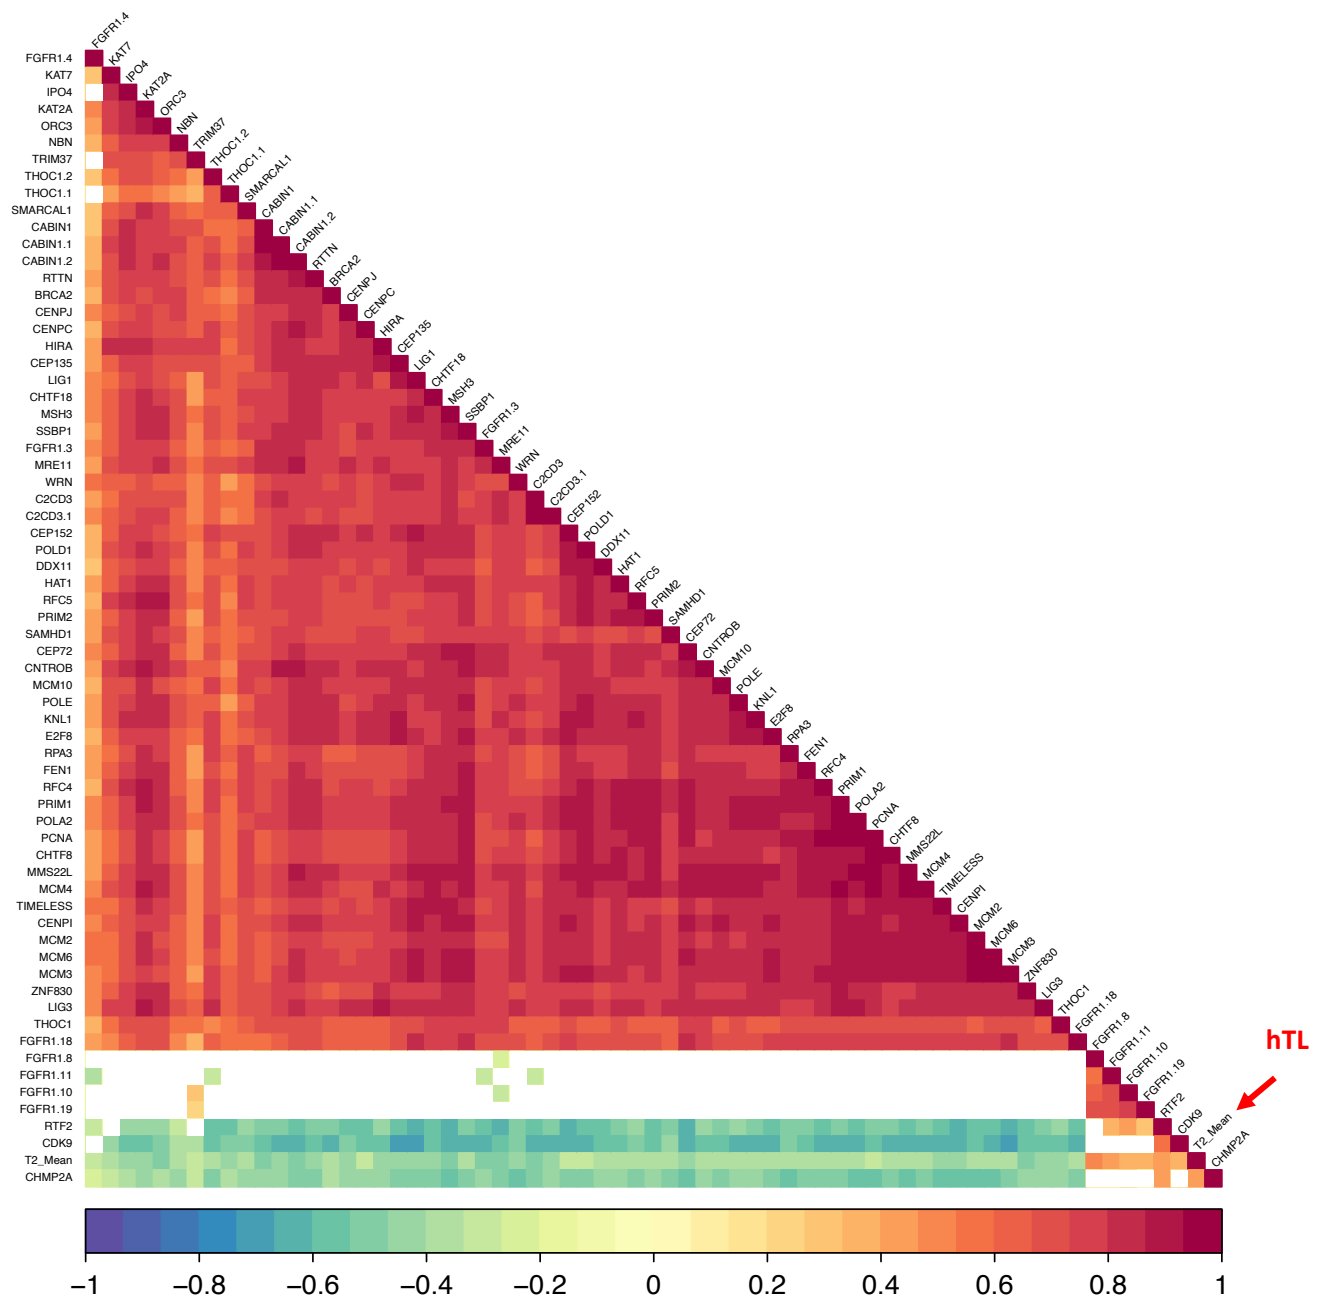

**DNA replication genes whose expression variance**  
is explained by islands and correlated with T2L

### Supplementary Figure 10: Correlation among hTL-correlated genes

Correlograms obtained with Spearman correlation of hTL and genes involved in cell cycle, DNA repair, and DNA replication from the variance partition attributable to island (**Figure 4a-c**). The genes shown here are significantly ( $r > 0.3$ ,  $p < 0.05$ ) correlated with hTL. When the genes are significantly correlated between each other ( $p < 0.05$ ) they are shown according to the color scale of the correlation coefficient. Blank cells indicate genes that are not significantly correlated ( $p > 0.05$ ).  $p$ -values were adjusted by the Benjamini–Hochberg method.

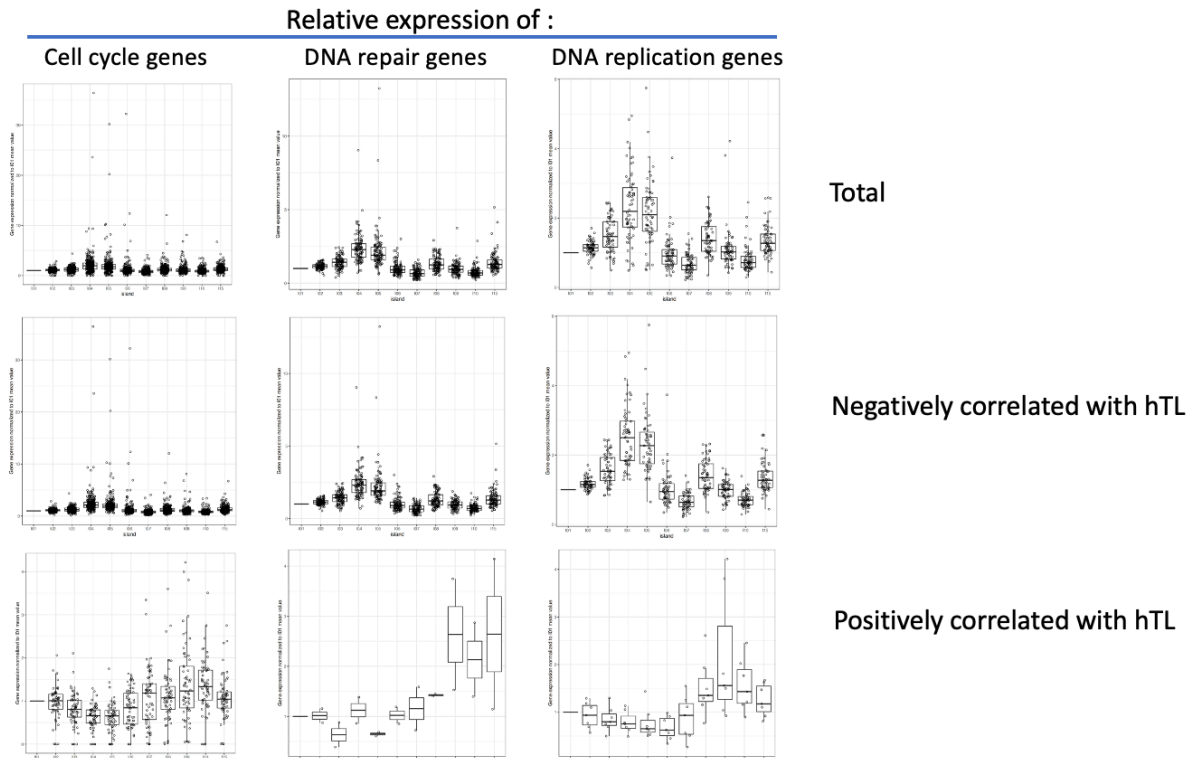

**Supplementary Figure 11: Expression of hTL-correlated genes between islands**

Gene expression by island for the genes correlated with hTL in the different terms/pathways (Supplementary Fig. 9). The expression of each gene is normalized to the mean expression value of I01 (Las Perlas). The results for total, negatively correlated and positively correlated genes are shown separately. (n = 103 samples). The boxplots are defined as follows: the lower and upper bounds of the box represent the first (Q1) and the third (Q3) quartile, respectively. The entire box represents the interquartile range (IQ). The median is represented as a line across the box. Whiskers extending from Q1 and Q3 are defined as 1.5xIQ. Source data are provided as a Source Data file.

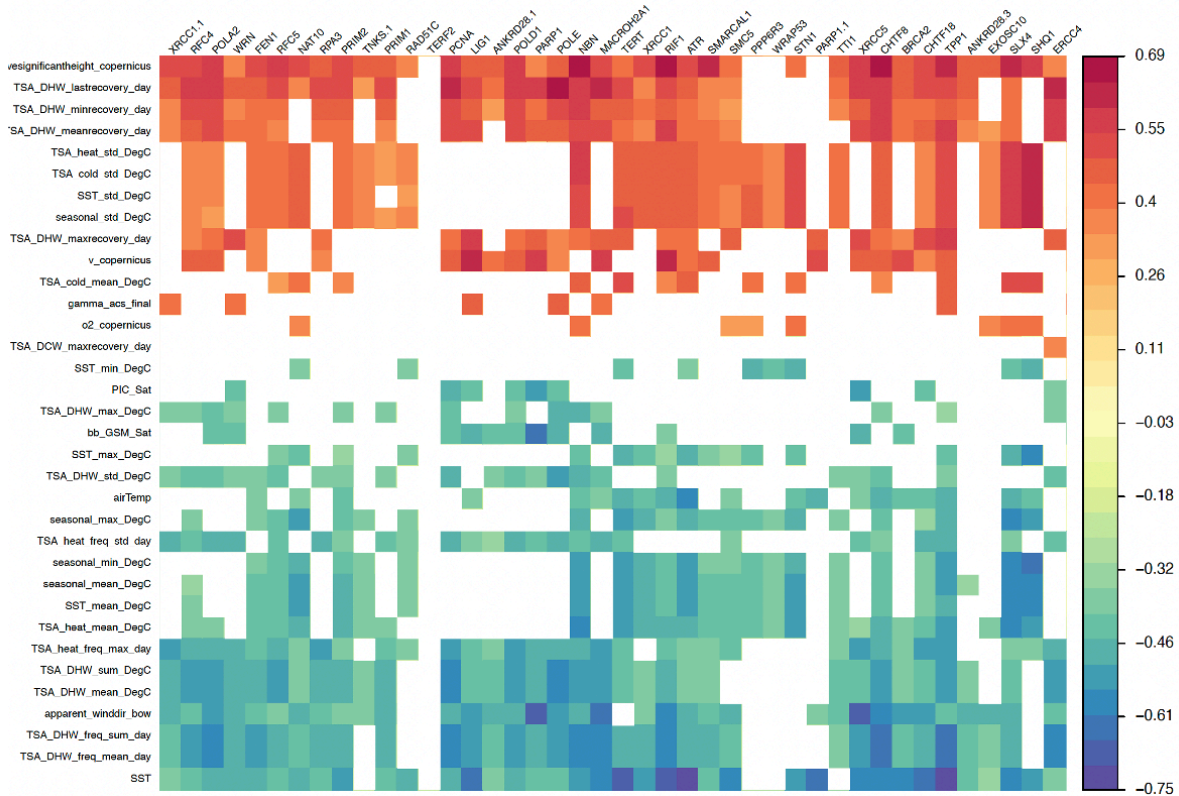

**Supplementary Figure 12: Correlation between gene expression and environmental variables**

Correlation matrix obtained with Spearman correlation between telomere gene expression and environmental variables in *Pocillopora* spp. ( $r_s > 0.3$ ,  $p < 0.05$ ) (related to **Figure 5**).  $p$ -values were adjusted by the Benjamini–Hochberg method.



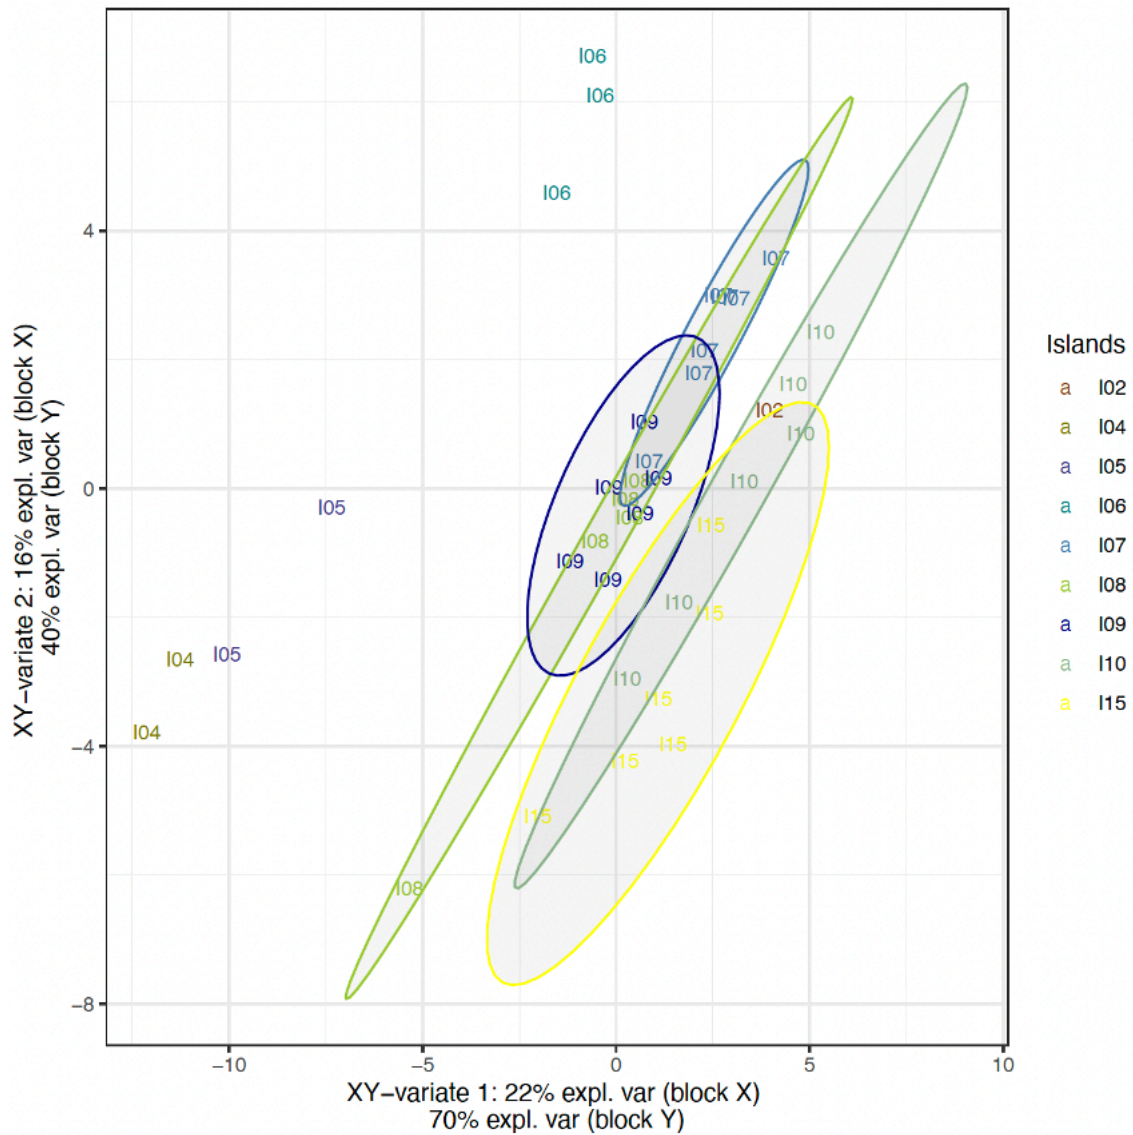

**Supplementary Figure 13: sPLS model of gene expression and environmental variables**  
 Sample plot generated using the *plotIndiv* function corresponding to the sPLS model representing the relationship between gene expression and environmental variables (related to Fig. 5). Samples are labelled according to their island of origin.

| Pocillopora hTL |               |             |             |             |    |              |              |              |             |             |      |             |                                             |
|-----------------|---------------|-------------|-------------|-------------|----|--------------|--------------|--------------|-------------|-------------|------|-------------|---------------------------------------------|
| r.squared       | adj.r.squared | sigma       | statistic   | p.value     | df | logLik       | AIC          | BIC          | deviance    | df.residual | nobs | error.rate  | frml                                        |
| 0.08021973      | 0.077538138   | 0.178735877 | 29.91514696 | 8.71482E-08 | 1  | 105.506231   | -205.0120462 | -193.4814129 | 10.95765426 | 343         | 345  | 0.03516845  | log(hTL_Mean) ~ ColonyDiameterMean          |
| 0.081163371     | 0.075790057   | 0.178905151 | 15.10490115 | 5.17308E-07 | 2  | 105.6830921  | -203.3661841 | -187.9920064 | 10.94641214 | 342         | 345  | 0.035201757 | log(hTL_Mean) ~ poly(ColonyDiameterMean, 2) |
| 0.072889158     | 0.070186211   | 0.179446717 | 26.96655017 | 3.55605E-07 | 1  | 104.1366652  | -202.2733304 | -190.7426971 | 11.04988565 | 343         | 345  | 0.033038317 | log(hTL_Mean) ~ log(ColonyDiameterMean)     |
| 0.069382148     | 0.066968976   | 0.180881406 | 25.57234057 | 6.95255E-07 | 1  | -474.7639061 | 955.5278122  | 967.0584455  | 316.695254  | 343         | 345  | 0.189050063 | hTL_Mean ~ ColonyDiameterMean               |
| 0.070154353     | 0.064716559   | 0.180186564 | 12.90149036 | 3.96513E-06 | 2  | -474.6207101 | 957.2412023  | 972.615536   | 316.4267437 | 342         | 345  | 0.1852627   | hTL_Mean ~ poly(ColonyDiameterMean, 2)      |
| 0.062693965     | 0.05961294    | 0.184328066 | 22.9423795  | 2.48827E-06 | 1  | -475.959199  | 957.998398   | 969.5290312  | 318.9556161 | 343         | 345  | 0.189743235 | hTL_Mean ~ log(ColonyDiameterMean)          |
| Pocillopora sTL |               |             |             |             |    |              |              |              |             |             |      |             |                                             |
| r.squared       | adj.r.squared | sigma       | statistic   | p.value     | df | logLik       | AIC          | BIC          | deviance    | df.residual | nobs | error.rate  | frml                                        |
| 0.096339772     | 0.093189121   | 0.467604059 | 30.49063585 | 7.53464E-08 | 1  | -188.732299  | 383.4647979  | 394.4536794  | 62.53491703 | 286         | 288  | 0.049048977 | log(sTL_Mean) ~ ColonyDiameterMean          |
| 0.096478113     | 0.090137609   | 0.468387842 | 15.21615727 | 5.26334E-07 | 2  | -188.7103524 | 385.4207049  | 400.0725468  | 62.52534361 | 285         | 288  | 0.049131191 | log(sTL_Mean) ~ poly(ColonyDiameterMean, 2) |
| 0.079578651     | 0.076360395   | 0.471920703 | 24.72725601 | 1.14052E-06 | 1  | -191.3788479 | 388.7578958  | 399.7465772  | 63.69481683 | 286         | 288  | 0.049501768 | log(sTL_Mean) ~ poly(ColonyDiameterMean)    |
| 0.05144387      | 0.048127341   | 5.768561821 | 15.51091865 | 0.000103123 | 1  | -912.2487062 | 1830.497412  | 1841.486294  | 9510.425278 | 286         | 288  | 0.604879172 | sTL_Mean ~ ColonyDiameterMean               |
| 0.05144993      | 0.044793199   | 5.776652311 | 7.729248707 | 0.000538397 | 2  | -912.2478374 | 1832.495675  | 1847.147517  | 9510.367899 | 285         | 288  | 0.605937606 | sTL_Mean ~ poly(ColonyDiameterMean, 2)      |
| 0.042026741     | 0.038677184   | 5.795116231 | 12.54695553 | 0.000463229 | 1  | -913.6712629 | 1833.342566  | 1844.331447  | 9604.944428 | 286         | 288  | 0.607874365 | sTL_Mean ~ log(ColonyDiameterMean)          |
| Porites hTL     |               |             |             |             |    |              |              |              |             |             |      |             |                                             |
| r.squared       | adj.r.squared | sigma       | statistic   | p.value     | df | logLik       | AIC          | BIC          | deviance    | df.residual | nobs | error.rate  | frml                                        |
| 0.001333042     | -0.001837329  | 0.273785377 | 0.420488828 | 0.511717508 | 1  | -38.06249038 | 82.12498975  | 83.49168607  | 23.59810949 | 315         | 317  | 0.04663208  | log(hTL_Mean) ~ ColonyDiameterMean          |
| 0.000823237     | -0.002249345  | 0.273785177 | 0.29116757  | 0.589889855 | 1  | -38.12752662 | 82.25500724  | 83.53171257  | 23.60779391 | 315         | 317  | 0.046672779 | log(hTL_Mean) ~ log(ColonyDiameterMean)     |
| 0.00371468      | -0.002631086  | 0.273813784 | 0.585379334 | 0.557501137 | 2  | -37.8840454  | 83.3680908   | 86.4006979   | 23.54183231 | 314         | 317  | 0.04668169  | log(hTL_Mean) ~ poly(ColonyDiameterMean, 2) |
| 0.002642093     | -0.000524123  | 2.588364947 | 0.834464046 | 0.361883519 | 1  | -750.2757101 | 1506.55142   | 1517.828126  | 2110.384426 | 315         | 317  | 0.441282568 | hTL_Mean ~ log(ColonyDiameterMean)          |
| 0.001304451     | -0.001866011  | 2.590100104 | 0.411438735 | 0.521706601 | 1  | -750.4881457 | 1506.976291  | 1518.252997  | 2113.214844 | 315         | 317  | 0.44157839  | hTL_Mean ~ ColonyDiameterMean               |
| 0.001520221     | -0.004839523  | 2.593940931 | 0.239038015 | 0.787528099 | 2  | -750.4538978 | 1508.907796  | 1523.943403  | 2112.75828  | 314         | 317  | 0.442233201 | hTL_Mean ~ poly(ColonyDiameterMean, 2)      |
| Porites sTL     |               |             |             |             |    |              |              |              |             |             |      |             |                                             |
| r.squared       | adj.r.squared | sigma       | statistic   | p.value     | df | logLik       | AIC          | BIC          | deviance    | df.residual | nobs | error.rate  | frml                                        |
| 0.001835688     | -0.001974099  | 0.52342528  | 0.48183476  | 0.488207434 | 1  | -202.7013898 | 411.4027795  | 422.1396288  | 71.7859393  | 262         | 264  | 0.045762928 | log(sTL_Mean) ~ ColonyDiameterMean          |
| 0.00079896      | -0.003015086  | 0.523714421 | 0.209416056 | 0.647604739 | 1  | -202.8384581 | 411.6769161  | 422.4047635  | 71.8053203  | 262         | 264  | 0.045786594 | log(sTL_Mean) ~ log(ColonyDiameterMean)     |
| 0.00222553      | -0.00491942   | 0.52421135  | 0.356283066 | 0.700628386 | 2  | -202.5840562 | 413.1681124  | 427.4719088  | 71.72215784 | 261         | 264  | 0.045830139 | log(sTL_Mean) ~ poly(ColonyDiameterMean, 2) |
| 0.004252114     | 0.0045155     | 9.054554982 | 1.11881127  | 0.291148819 | 1  | -955.2587029 | 1916.517406  | 1927.245253  | 21480.06107 | 262         | 264  | 0.791611085 | sTL_Mean ~ log(ColonyDiameterMean)          |
| 0.00155384      | -0.002257023  | 9.066814683 | 0.407739688 | 0.523676759 | 1  | -955.6159122 | 1917.231824  | 1927.959672  | 21538.26766 | 262         | 264  | 0.792882912 | sTL_Mean ~ ColonyDiameterMean               |
| 0.006598002     | -0.001014274  | 9.061191739 | 0.866758103 | 0.421518186 | 2  | -954.9473565 | 1917.894713  | 1932.198609  | 21429.45609 | 261         | 264  | 0.792191316 | sTL_Mean ~ poly(ColonyDiameterMean, 2)      |

### Supplementary Table 1 Regression model for the 32 islands

Regression models between TL and colony diameter mean for the 32 islands. r.squared: multiple R<sup>2</sup>; adj.r.squared: adjusted R<sup>2</sup>; sigma: Residual Standard Error (RSE); statistic: F-test value; p.value: p-value of the F-test; df: degree of freedom of the overall F-test; logLik: log-likelihood of the model; AIC: Akaike's Information Criterion; BIC: Bayesian Information Criterion; df.residual: Residual degrees of freedom; error.rate: RSE divided by the mean of TL; frml: formula of the model

| Pocillopora |              |                      |
|-------------|--------------|----------------------|
| Variable    | R2_conditior | R2_marginal          |
| hTL_Mean    | 0.385564468  | 0.00148136575877723  |
| hTL_Med     | 0.348170197  | 0.0180681054639989   |
| hTL_Q3      | 0.435161114  | 0.00944006944738771  |
| hTL_Q1      | 0.297177488  | 0.0201407626550593   |
| hTL_IQ      | 0.456166650  | 0.0044539748181321   |
| sTL_Mean    | 0.453202394  | 0.000307014721826544 |
| sTL_Med     | 0.380238778  | 1.0723315191928e-07  |
| sTL_Q3      | 0.268080119  | 0.00328138754819394  |
| sTL_Q1      | 0.381634366  | 0.000340510802483626 |
| sTL_IQ      | 0.259583308  | 0.00353045040265365  |
|             |              |                      |
| Porites     |              |                      |
| Variable    | R2_conditior | R2_marginal          |
| hTL_Mean    | 0.158962699  | 0.00711728202982334  |
| hTL_Med     | 0.200836769  | 0.000403365007582494 |
| hTL_Q3      | 0.189367375  | 0.002667874999667    |
| hTL_Q1      | 0.152205307  | 0.001892524897665    |
| hTL_IQ      | 0.184209367  | 0.00212670109477538  |
| sTL_Mean    | 0.234392958  | 0.00162385206679871  |
| sTL_Med     | 0.240415948  | 0.00177927789304019  |
| sTL_Q3      | 0.087560389  | 0.00202833862581076  |
| sTL_Q1      | 0.217739106  | 0.00774035538845887  |
| sTL_IQ      | 0.084065245  | 0.00365071106071572  |

**Supplementary Table 2: R2 values of variance partition**

Marginal and conditional R2 related to the variance partition analysis in **Fig. 2**. The marginal R2 considers only the variance of the fixed effects, while the conditional R2 considers both the fixed and random effects (i.e., the total model).



# Pocillopora hTL

| r.squared   | adj.r.squared | sigma       | statistic   | p.value     | df | logLik       | AIC          | BIC            | deviance    | df.residual | emr.rate    | fmi          | log(TL_Mean) | logTL       | logTL_Mean  |
|-------------|---------------|-------------|-------------|-------------|----|--------------|--------------|----------------|-------------|-------------|-------------|--------------|--------------|-------------|-------------|
| 0.50992234  | 0.42794573    | 0.14666739  | 6.22033918  | 6.28624233  | 47 | 200.0697101  | -304.134021  | -122.9609279   | 5.441232123 | 275         | 0.627371958 | log(TL_Mean) | -            | 0.50992234  | 0.42794573  |
| 0.50922458  | 0.42585806    | 0.14020219  | 6.06585281  | 1.58521E-22 | 48 | 200.069728   | -302.1394571 | -117.1864314   | 5.441231193 | 274         | 0.627421859 | log(TL_Mean) | -            | 0.50922458  | 0.42585806  |
| 0.48572792  | 0.41042376    | 0.142801788 | 6.45021658  | 1.69342E-22 | 42 | 192.311262   | -296.8226525 | -116.3165936   | 5.708925213 | 280         | 0.627787998 | log(TL_Mean) | -            | 0.48572792  | 0.41042376  |
| 0.48746988  | 0.40823452    | 0.14748567  | 6.21482685  | 4.33351E-22 | 43 | 192.311262   | -296.8226525 | -116.3165936   | 5.708925213 | 279         | 0.627832328 | log(TL_Mean) | -            | 0.48746988  | 0.40823452  |
| 0.42390307  | 0.31711835    | 0.14748567  | 7.53205915  | 6.37685E-22 | 30 | 175.1642397  | -288.3284795 | -117.1373815   | 6.351543377 | 292         | 0.628699533 | log(TL_Mean) | -            | 0.42390307  | 0.31711835  |
| 0.42801329  | 0.36904564    | 0.14772795  | 7.25843543  | 1.74523E-21 | 31 | 175.1642397  | -288.3284795 | -117.1373815   | 6.351543377 | 291         | 0.628746855 | log(TL_Mean) | -            | 0.42801329  | 0.36904564  |
| 0.44155413  | 0.37529678    | 0.14698266  | 6.97420027  | 4.59153E-21 | 35 | 179.0406294  | -286.09152   | -116.200310744 | 6.200310744 | 287         | 0.629680137 | log(TL_Mean) | -            | 0.44155413  | 0.37529678  |
| 0.44130649  | 0.37326211    | 0.14723267  | 6.46233427  | 1.18953E-20 | 36 | 179.0406294  | -286.09152   | -116.200310744 | 6.200310744 | 286         | 0.629680137 | log(TL_Mean) | -            | 0.44130649  | 0.37326211  |
| 0.22718751  | 0.225971379   | 0.163822183 | 5.93281206  | 1.04597E-12 | 20 | 136.3807187  | -230.6143733 | -151.3518549   | 8.085210067 | 302         | 0.631834846 | log(TL_Mean) | -            | 0.22718751  | 0.225971379 |
| 0.26458012  | 0.226891818   | 0.16415819  | 6.05860829  | 1.48739E-12 | 19 | 134.7233764  | -229.4467528 | -153.9557219   | 8.165211752 | 303         | 0.631943788 | log(TL_Mean) | -            | 0.26458012  | 0.226891818 |
| 0.224901736 | 0.189555236   | 0.161420987 | 5.27427209  | 3.21229E-11 | 15 | 128.261125   | -220.562295  | -160.134003    | 8.60275826  | 307         | 0.632079642 | log(TL_Mean) | -            | 0.224901736 | 0.189555236 |
| 0.20922748  | 0.175853801   | 0.168836365 | 6.268143104 | 1.76117E-10 | 14 | 123.0406294  | -216.805388  | -159.4622656   | 8.779761149 | 308         | 0.6328541   | log(TL_Mean) | -            | 0.20922748  | 0.175853801 |
| 0.092971735 | 0.078629544   | 0.187517507 | 4.91343808  | 2.77014E-05 | 8  | 101.9804105  | -185.9680209 | -151.9289229   | 10.00670913 | 314         | 0.634737967 | log(TL_Mean) | -            | 0.092971735 | 0.078629544 |
| 0.05452907  | 0.051574474   | 0.181118933 | 18.45587327 | 2.30989E-05 | 2  | 94.27348682  | -182.8489736 | -171.223319    | 10.49737128 | 320         | 0.63524299  | log(TL_Mean) | -            | 0.05452907  | 0.051574474 |
| 0.06345496  | 0.046023653   | 0.18164776  | 3.180550005 | 0.00189304  | 7  | 95.86043923  | -175.738785  | -145.5424661   | 10.39382763 | 315         | 0.635347285 | log(TL_Mean) | -            | 0.06345496  | 0.046023653 |
| 0.08454932  | 0.0629815     | 0.178947587 | 5.205380271 | 1.34589E-08 | 47 | 355.893316   | 808.8768631  | 988.1571373    | 171.5170622 | 275         | 0.53677719  | log(TL_Mean) | -            | 0.08454932  | 0.0629815   |
| 0.465330181 | 0.373851051   | 0.791123286 | 5.077828068 | 3.05399E-18 | 48 | -355.463935  | 808.8768631  | 988.1571373    | 171.5170622 | 274         | 0.53677719  | log(TL_Mean) | -            | 0.465330181 | 0.373851051 |
| 0.440387896 | 0.35844496    | 0.800798992 | 5.37436735  | 3.85519E-18 | 42 | -362.604909  | 811.729816   | 974.0353182    | 179.8571855 | 280         | 0.55828189  | log(TL_Mean) | -            | 0.440387896 | 0.35844496  |
| 0.40420659  | 0.3561622     | 0.802262148 | 5.22792259  | 8.32566E-18 | 43 | -362.604909  | 811.729816   | 974.0353182    | 179.8571855 | 279         | 0.55828189  | log(TL_Mean) | -            | 0.40420659  | 0.3561622   |
| 0.39734608  | 0.317473319   | 0.825971658 | 6.148864979 | 1.98992E-17 | 30 | -379.5880396 | 821.1769792  | 938.1877122    | 199.2102027 | 292         | 0.56072691  | log(TL_Mean) | -            | 0.39734608  | 0.317473319 |
| 0.37931376  | 0.315389043   | 0.827231858 | 5.929314673 | 4.78414E-17 | 31 | -379.5880396 | 821.1769792  | 938.1877122    | 199.2102027 | 291         | 0.56072691  | log(TL_Mean) | -            | 0.37931376  | 0.315389043 |
| 0.39246012  | 0.32102028    | 0.823816631 | 5.463973054 | 1.1705E-16  | 35 | -375.966092  | 823.921859   | 959.8100396    | 194.7793924 | 287         | 0.56037611  | log(TL_Mean) | -            | 0.39246012  | 0.32102028  |
| 0.39315123  | 0.318886265   | 0.825116047 | 5.293919318 | 2.68944E-16 | 36 | -375.9139232 | 825.8232624  | 965.4816896    | 194.7315163 | 286         | 0.56056046  | log(TL_Mean) | -            | 0.39315123  | 0.318886265 |
| 0.242320396 | 0.200935053   | 0.893708678 | 5.248345009 | 6.05248E-11 | 20 | -410.3662731 | 862.7785462  | 942.044287     | 241.2119905 | 302         | 0.173980001 | log(TL_Mean) | -            | 0.242320396 | 0.200935053 |
| 0.242718003 | 0.197739004   | 0.827231858 | 5.929314673 | 6.35337E-11 | 19 | -410.3662731 | 862.7785462  | 942.044287     | 241.2119905 | 303         | 0.173980001 | log(TL_Mean) | -            | 0.242718003 | 0.197739004 |
| 0.203572769 | 0.165120835   | 0.91351826  | 5.574165137 | 1.62447E-09 | 15 | -420.972363  | 872.1842702  | 932.5775449    | 256.1962613 | 307         | 0.17762764  | log(TL_Mean) | -            | 0.203572769 | 0.165120835 |
| 0.188130102 | 0.15382826    | 0.91966584  | 5.94009069  | 5.7918E-09  | 14 | -422.7272673 | 875.5447527  | 932.5775449    | 260.4968132 | 308         | 0.179957239 | log(TL_Mean) | -            | 0.188130102 | 0.15382826  |
| 0.090272021 | 0.06948056    | 0.893708678 | 5.248345009 | 8.81117E-08 | 20 | -410.3662731 | 862.7785462  | 942.044287     | 241.2119905 | 302         | 0.18742725  | log(TL_Mean) | -            | 0.090272021 | 0.06948056  |
| 0.047241889 | 0.044445082   | 0.97371828  | 18.9504669  | 8.153E-05   | 2  | -448.5053473 | 903.016847   | 914.3343453    | 305.644291  | 320         | 0.190176453 | log(TL_Mean) | -            | 0.047241889 | 0.044445082 |
| 0.062240631 | 0.044378547   | 0.97345852  | 3.484511289 | 0.002379025 | 7  | -448.5053473 | 903.016847   | 914.3343453    | 305.644291  | 315         | 0.190183074 | log(TL_Mean) | -            | 0.062240631 | 0.044378547 |

# Pocillopora sTL

| r.squared   | adj.r.squared | sigma       | statistic   | p.value     | df  | logLik       | AIC         | BIC         | deviance    | df.residual | emr.rate    | fmi          | log(TL_Mean) | logTL       | logTL_Mean  |
|-------------|---------------|-------------|-------------|-------------|-----|--------------|-------------|-------------|-------------|-------------|-------------|--------------|--------------|-------------|-------------|
| 0.81288833  | 0.54514728    | 0.315272162 | 4.143765818 | 6.70035E-28 | 49  | 48.71828634  | 179.4365272 | 326.3599213 | 22.46418239 | 226         | 0.616585361 | log(TL_Mean) | -            | 0.81288833  | 0.54514728  |
| 0.613431961 | 0.544708754   | 0.31642881  | 4.91765361  | 1.44485E-28 | 41  | -48.25868082 | 180.5136718 | 331.0204628 | 22.38637225 | 225         | 0.631680641 | log(TL_Mean) | -            | 0.613431961 | 0.544708754 |
| 0.57338016  | 0.52491861    | 0.322186861 | 1.117458919 | 9.94728E-28 | 61  | -31.36593993 | 180.7318799 | 284.6532728 | 24.70528744 | 238         | 0.632393933 | log(TL_Mean) | -            | 0.57338016  | 0.52491861  |
| 0.573058547 | 0.525403801   | 0.322025741 | 1.148003375 | 1.96989E-28 | 59  | -30.67370992 | 181.3474198 | 288.8523091 | 24.70528744 | 237         | 0.632344427 | log(TL_Mean) | -            | 0.573058547 | 0.525403801 |
| 0.61912689  | 0.54532429    | 0.315204566 | 8.392350084 | 8.81472E-24 | 44  | -46.28298392 | 182.5656778 | 343.8230117 | 22.05658991 | 222         | 0.631658173 | log(TL_Mean) | -            | 0.61912689  | 0.54532429  |
| 0.62059638  | 0.545005103   | 0.316308906 | 8.215753308 | 1.73351E-27 | 45  | -46.28298392 | 182.5656778 | 343.8230117 | 22.05658991 | 221         | 0.631658173 | log(TL_Mean) | -            | 0.62059638  | 0.545005103 |
| 0.578328632 | 0.519832928   | 0.323998177 | 10.24714334 | 7.11035E-29 | 32  | -60.8072335  | 187.2074487 | 305.4628249 | 24.56410756 | 234         | 0.632541376 | log(TL_Mean) | -            | 0.578328632 | 0.519832928 |
| 0.57833369  | 0.520142072   | 0.323998177 | 10.24714334 | 1.23235E-28 | 33  | -60.8072335  | 187.2074487 | 305.4628249 | 24.56410756 | 233         | 0.632541376 | log(TL_Mean) | -            | 0.57833369  | 0.520142072 |
| 0.384533019 | 0.338861174   | 0.379886071 | 8.573406574 | 8.7956E-19  | 110 | -111.115719  | 260.2231438 | 331.89307   | 35.4203851  | 247         | 0.638152776 | log(TL_Mean) | -            | 0.384533019 | 0.338861174 |
| 0.86737127  | 0.339408998   | 0.379946351 | 8.186101773 | 1.76537E-17 | 20  | -109.6286272 | 261.253645  | 336.5070769 | 35.51237052 | 246         | 0.638160638 | log(TL_Mean) | -            | 0.86737127  | 0.339408998 |
| 0.52933333  | 0.291925945   | 0.38363616  | 8.60302803  | 1.51933E-15 | 15  | -121.550005  | 275.070017  | 332.405958  | 38.83869808 | 251         | 0.639608327 | log(TL_Mean) | -            | 0.52933333  | 0.291925945 |
| 0.523286789 | 0.287389151   | 0.384023065 | 8.60302803  | 1.87024E-14 | 16  | -121.550005  | 275.070017  | 332.405958  | 38.83869808 | 252         | 0.639608327 | log(TL_Mean) | -            | 0.523286789 | 0.287389151 |
| 0.515656079 | 0.128639898   | 0.48370126  | 6.588848749 | 3.58585E-05 | 8   | -152.7919133 | 335.835266  | 355.835266  | 49.12807288 | 258         | 0.643827668 | log(TL_Mean) | -            | 0.515656079 | 0.128639898 |
| 0.129643408 | 0.10948077    | 0.441141197 | 6.429893165 | 2.47966E-06 | 7   | -156.198857  | 328.3979174 | 357.056879  | 50.40283902 | 259         | 0.64430886  | log(TL_Mean) | -            | 0.129643408 | 0.10948077  |
| 0.05411786  | 0.050012778   | 0.452002678 | 1.280372178 | 1.93235E-05 | 2   | -162.603921  | 379.079584  | 348.4554847 | 60.44557298 | 248         | 0.645529958 | log(TL_Mean) | -            | 0.05411786  | 0.050012778 |
| 0.553309808 | 0.502627487   | 0.194111127 | 10.01880588 | 2.52828E-28 | 74  | -160.0496636 | 156.172673  | 160.0496636 | 41.89150938 | 232         | 0.642137439 | log(TL_Mean) | -            | 0.553309808 | 0.502627487 |
| 0.553419688 | 0.500695648   | 0.203734913 | 10.4822796  | 4.98811E-28 | 72  | -160.0496636 | 156.172673  | 160.0496636 | 41.89150938 | 231         | 0.642221054 | log(TL_Mean) | -            | 0.553419688 | 0.500695648 |
| 0.553696366 | 0.499462283   | 0.221364858 | 9.428269973 | 1.05063E-26 | 32  | -743.4724934 | 1552.944987 | 1671.203085 | 41.89150938 | 234         | 0.642390824 | log(TL_Mean) | -            | 0.553696366 | 0.499462283 |
| 0.555510661 | 0.494464918   | 0.229278878 | 9.090971799 | 3.16032E-26 | 33  | -743.4724934 | 1552.944987 | 1671.203085 | 41.89150938 | 233         | 0.642482068 | log(TL_Mean) | -            | 0.555510661 | 0.494464918 |
| 0.579983608 | 0.502815801   | 0.196447957 | 8.781783265 | 5.15813E-25 | 40  | -737.1571005 | 1556.31420  | 1703.23755  | 39.76486156 | 226         | 0.642192489 | log(TL_Mean) | -            | 0.579983608 | 0.502815801 |
| 0.578010489 | 0.500634578   | 0.203839179 | 7.61437624  | 4.56926E-24 | 41  | -737.1571005 | 1556.31420  | 1703.23755  | 39.76486156 | 225         | 0.642222066 | log(TL_Mean) | -            | 0.578010489 | 0.500634578 |
| 0.579993206 | 0.498460488   | 0.212225778 | 1.280372178 | 1.23235E-24 | 44  | -741.788504  | 1561.788504 | 1723.046984 | 41.89150938 | 222         | 0.642082723 | log(TL_Mean) | -            | 0.579993206 | 0.498460488 |
| 0.580024489 | 0.496400455   | 0.21258018  | 6.938844608 | 3.29691E-23 | 45  | -735.8847731 | 1563.788574 | 1728.609584 | 39.38165261 | 221         | 0.642003064 | log(TL_Mean) | -            | 0.580024489 | 0.496400455 |
| 0.285105274 | 0.211550193   | 0.282309997 | 4.950142321 | 1.58849E-09 | 19  | -101.3018969 | 160.603982  | 1732.273888 | 899.919329  | 247         | 0.635038905 | log(TL_Mean) | -            | 0.285105274 | 0.2115      |

| Pocillopora |              |             |
|-------------|--------------|-------------|
| Variable    | R2_conditior | R2_marginal |
| hTL_Mean    | 0.116721607  | 0           |
| hTL_Med     | 0.154398860  | 0           |
| hTL_Q3      | 0.164377142  | 0           |
| hTL_Q1      | 0.140371332  | 0           |
| hTL_IQ      | 0.186773575  | 0           |
| sTL_Mean    | 0.196642379  | 0           |
| sTL_Med     | 0.178153814  | 0           |
| sTL_Q3      | 0.228716366  | 0           |
| sTL_Q1      | 0.184217637  | 0           |
| sTL_IQ      | 0.326476388  | 0           |
|             |              |             |
| Porites     |              |             |
| Variable    | R2_conditior | R2_marginal |
| hTL_Mean    | 0.069784033  | 0           |
| hTL_Med     | 0.115918231  | 0           |
| hTL_Q3      | 0.140117746  | 0           |
| hTL_Q1      | 0.073030285  | 0           |
| hTL_IQ      | 0.111594215  | 0           |
| sTL_Mean    | 0.158229362  | 0           |
| sTL_Med     | 0.225056949  | 0           |
| sTL_Q3      | 0.121876166  | 0           |
| sTL_Q1      | 0.172565639  | 0           |
| sTL_IQ      | 0.096695425  | 0           |

**Supplementary Table 4: R2 of variance partition analysis**

Marginal and conditional R2 related to the variance partition analysis in **Supplementary Fig. 6b**. The marginal R2 considers only the variance of the fixed effects, while the conditional R2 considers both the fixed and random effects (i.e., the total model). Since the island and the host species are random effects, the marginal R2 is null.



| Pocillopora hTL                                                            |               |             |             |             |    |               |              |              |             |             |             |                                         |
|----------------------------------------------------------------------------|---------------|-------------|-------------|-------------|----|---------------|--------------|--------------|-------------|-------------|-------------|-----------------------------------------|
| r.squared                                                                  | adj.r.squared | sigma       | statistic   | p.value     | df | logLik        | AIC          | BIC          | deviance    | df.residual | error.rate  | frml                                    |
| 0.202067663                                                                | 0.13197903    | 0.158884393 | 2.893030063 | 0.000969446 | 14 | 75,46477246   | -120,9295449 | -74,61559989 | 3,736149036 | 148         | 0,030391336 | log(hTL_Mean) ~ island+genetic_clusters |
| 0.140855452                                                                | 0.08998505    | 0.182632334 | 2,789907844 | 0,004984471 | 10 | 69,47778666   | -116,9555733 | -82,99201363 | 4,022762341 | 152         | 0,031117805 | log(sTL_Mean) ~ island                  |
| 0.048999584                                                                | 0.02477027    | 0.168410667 | 2,022326864 | 0,093888148 | 5  | 61,25002398   | -110,500048  | -91,97446995 | 4,452857982 | 157         | 0,032213518 | log(hTL_Mean) ~ genetic_clusters        |
| 0.186960057                                                                | 0.11554439    | 0.895032951 | 2,617913614 | 0,0026232   | 14 | -204,58198484 | 439,1639696  | 485,4779146  | 118,5604296 | 148         | 0,171201506 | hTL_Mean ~ island+genetic_clusters      |
| 0.123802299                                                                | 0.07192217    | 0.91683926  | 2,386314484 | 0,014838497 | 10 | -210,6417173  | 443,2834347  | 477,2469944  | 127,7703226 | 152         | 0,175372607 | hTL_Mean ~ island                       |
| 0.050992184                                                                | 0.02681364    | 0.93885805  | 2,108984969 | 0,082205165 | 5  | -217,1075652  | 446,2151305  | 464,7407085  | 138,3877573 | 157         | 0,179583969 | hTL_Mean ~ genetic_clusters             |
| Pocillopora sTL                                                            |               |             |             |             |    |               |              |              |             |             |             |                                         |
| r.squared                                                                  | adj.r.squared | sigma       | statistic   | p.value     | df | logLik        | AIC          | BIC          | deviance    | df.residual | error.rate  | frml                                    |
| 0.42082145                                                                 | 0.35399316    | 0.27223361  | 6,297055076 | 2,93173E-08 | 13 | -6,897418546  | 41,7948371   | 80,46527216  | 7,707558409 | 104         | 0,029625902 | log(sTL_Mean) ~ island+genetic_clusters |
| 0.363789458                                                                | 0.31666275    | 0.279988846 | 7,719390594 | 3,8483E-08  | 9  | -12,39166501  | 44,78333003  | 72,40506938  | 8,466525415 | 108         | 0,030469868 | log(sTL_Mean) ~ island                  |
| 0.193020434                                                                | 0.16419974    | 0.309652389 | 6,697285016 | 7,18655E-05 | 5  | -26,30113962  | 64,60227925  | 81,17532286  | 10,73907543 | 112         | 0,03698012  | log(sTL_Mean) ~ genetic_clusters        |
| 0.254461129                                                                | 0.19923603    | 2,562716831 | 4,60770776  | 7,3698E-05  | 9  | -271,438261   | 562,8765221  | 590,4982614  | 709,2918959 | 108         | 0,27888407  | sTL_Mean ~ island                       |
| 0.296376284                                                                | 0.21518893    | 2,53706105  | 3,650522866 | 0,000140044 | 13 | -268,0532431  | 564,1064861  | 602,7769212  | 669,4145922 | 104         | 0,276096409 | sTL_Mean ~ island+genetic_clusters      |
| 0.133314859                                                                | 0.10236182    | 2,713307512 | 4,30700363  | 0,002804756 | 5  | -280,246517   | 572,493034   | 589,0660776  | 824,5482171 | 112         | 0,295276481 | sTL_Mean ~ genetic_clusters             |
| Porites hTL                                                                |               |             |             |             |    |               |              |              |             |             |             |                                         |
| r.squared                                                                  | adj.r.squared | sigma       | statistic   | p.value     | df | logLik        | AIC          | BIC          | deviance    | df.residual | error.rate  | frml                                    |
| 0.142073195                                                                | 0.08599955    | 0.166593368 | 2,533899203 | 0,00747818  | 11 | -66,90791282  | -109,8158256 | -72,61742851 | 4,246262588 | 153         | 0,030325808 | log(T2_Mean) ~ island                   |
| 0.14635611                                                                 | 0.07237364    | 0.16783056  | 1,978253888 | 0,026132454 | 14 | 67,31829582   | -104,6365916 | -58,13859523 | 4,225064531 | 150         | 0,03055102  | log(T2_Mean) ~ island+genetic_clusters  |
| 0.002596979                                                                | -0.01610433   | 0.175652224 | 0.13886619  | 0,936634757 | 4  | 54,55574977   | -99,11149955 | -83,61216741 | 4,936592618 | 160         | 0,031974836 | log(T2_Mean) ~ genetic_clusters         |
| 0.12241199                                                                 | 0.0650533     | 1,029939819 | 2,134148863 | 0,02493011  | 11 | -231,8508431  | 487,7016861  | 524,9000833  | 162,2987329 | 153         | 0,187484999 | T2_Mean ~ island                        |
| 0.127986001                                                                | 0.05241537    | 1,036877443 | 1,693561328 | 0,067540845 | 14 | -231,3280195  | 492,656039   | 539,1540354  | 161,2672248 | 150         | 0,188747889 | T2_Mean ~ island+genetic_clusters       |
| 0.002286532                                                                | -0.0164206    | 1,073878507 | 0,12222783  | 0,946890342 | 4  | -242,3705315  | 494,741063   | 510,2403951  | 184,5144076 | 160         | 0,195483374 | T2_Mean ~ genetic_clusters              |
| Porites sTL                                                                |               |             |             |             |    |               |              |              |             |             |             |                                         |
| r.squared                                                                  | adj.r.squared | sigma       | statistic   | p.value     | df | logLik        | AIC          | BIC          | deviance    | df.residual | error.rate  | frml                                    |
| 0.245278708                                                                | 0.19179452    | 0.39062856  | 4,58600431  | 2,98463E-05 | 10 | -60,42295518  | 142,8459104  | 174,9657006  | 19,37901533 | 127         | 0,040116012 | log(sTL_Mean) ~ island                  |
| 0.259077024                                                                | 0.1873748     | 0.391695192 | 3,613235561 | 0,000121033 | 13 | -59,15900294  | 146,3180059  | 187,1977388  | 19,0247153  | 124         | 0,040225551 | log(sTL_Mean) ~ island+genetic_clusters |
| 0.054117079                                                                | 0.03278137    | 0.42732008  | 2,536456098 | 0,059457359 | 4  | -75,88821851  | 161,776437   | 176,3763416  | 24,28748177 | 133         | 0,043885311 | log(sTL_Mean) ~ genetic_clusters        |
| 0.217285814                                                                | 0.16181788    | 5,024730036 | 3,917322978 | 0,000203343 | 10 | -410,3716278  | 842,7432556  | 874,8630458  | 3206,484815 | 127         | 0,516019947 | sTL_Mean ~ island                       |
| 0.223816321                                                                | 0.14870177    | 5,063891619 | 2,97966668  | 0,001099035 | 13 | -409,7977066  | 847,5954131  | 888,4751461  | 3179,731793 | 124         | 0,520041687 | sTL_Mean ~ island+genetic_clusters      |
| 0.037532043                                                                | 0.01582224    | 5,444779675 | 1,72880621  | 0,164137788 | 4  | -424,5328499  | 859,0656998  | 873,6656044  | 3942,86822  | 133         | 0,559157388 | sTL_Mean ~ genetic_clusters             |
| Commonality analysis                                                       |               |             |             |             |    |               |              |              |             |             |             |                                         |
| Variable                                                                   | Coefficient   | Total %     |             |             |    |               |              |              |             |             |             |                                         |
| Pocillopora hTL: log(hTL_Mean) ~ island + genetic_clusters (R2 adj = 0.13) |               |             |             |             |    |               |              |              |             |             |             |                                         |
| Unique to island                                                           | 0.1531        | 75,75       |             |             |    |               |              |              |             |             |             |                                         |
| Unique to genetic_clusters                                                 | 0.0612        | 30,29       |             |             |    |               |              |              |             |             |             |                                         |
| Common to island, and genetic_clusters                                     | -0.0122       | -6,04       |             |             |    |               |              |              |             |             |             |                                         |
| Total                                                                      | 0.2021        | 100         |             |             |    |               |              |              |             |             |             |                                         |
| Pocillopora sTL: log(sTL_Mean) ~ island + genetic_clusters (R2 adj = 0.35) |               |             |             |             |    |               |              |              |             |             |             |                                         |
| Unique to island                                                           | 0.2278        | 54,13       |             |             |    |               |              |              |             |             |             |                                         |
| Unique to genetic_clusters                                                 | 0.057         | 13,55       |             |             |    |               |              |              |             |             |             |                                         |
| Common to island, and genetic_clusters                                     | 0.136         | 32,31       |             |             |    |               |              |              |             |             |             |                                         |
| Total                                                                      | 0.4208        | 100         |             |             |    |               |              |              |             |             |             |                                         |
| Porites hTL: log(hTL_Mean) ~ island (R2 adj = 0.09)                        |               |             |             |             |    |               |              |              |             |             |             |                                         |
| Porites sTL: log(sTL_Mean) ~ island (R2 adj = 0.19)                        |               |             |             |             |    |               |              |              |             |             |             |                                         |

## Supplementary Table 5

Regression models between TL, island of sampling and genetic lineages for the 11 islands. r.squared: multiple R<sup>2</sup>; adj.r.squared: adjusted R<sup>2</sup>; sigma: Residual Standard Error (RSE); statistic: F-test value; p.value: p-value of the F-test; df: degree of freedom of the overall F-test; logLik: log-likelihood of the model; AIC: Akaike's Information Criterion; BIC: Bayesian Information Criterion; df.residual: Residual degrees of freedom; error.rate: RSE divided by the mean of TL; frml: formula of the model. The last sheet describes the commonality analysis (see Table 1 for details).

| Variable                  | Type of environmental data |
|---------------------------|----------------------------|
| lat                       | Historical                 |
| lon                       | Historical                 |
| SST_min_DegC              | Historical                 |
| SST_max_DegC              | Historical                 |
| SST_mean_DegC             | Historical                 |
| SST_std_DegC              | Historical                 |
| seasonal_min_DegC         | Historical                 |
| seasonal_max_DegC         | Historical                 |
| seasonal_mean_DegC        | Historical                 |
| seasonal_std_DegC         | Historical                 |
| SST_anomaly_min_DegC      | Historical                 |
| SST_anomaly_max_DegC      | Historical                 |
| SST_anomaly_mean_DegC     | Historical                 |
| SST_anomaly_std_DegC      | Historical                 |
| SST_anomaly_freq_max_day  | Historical                 |
| SST_anomaly_freq_mean_day | Historical                 |
| SST_anomaly_freq_std_day  | Historical                 |
| TSA_heat_max_DegC         | Historical                 |
| TSA_heat_mean_DegC        | Historical                 |
| TSA_heat_std_DegC         | Historical                 |
| TSA_heat_freq_max_day     | Historical                 |
| TSA_heat_freq_sum_day     | Historical                 |
| TSA_heat_freq_mean_day    | Historical                 |
| TSA_heat_freq_std_day     | Historical                 |
| TSA_DHW_max_DegC          | Historical                 |
| TSA_DHW_sum_DegC          | Historical                 |
| TSA_DHW_mean_DegC         | Historical                 |
| TSA_DHW_std_DegC          | Historical                 |
| TSA_DHW_freq_max_day      | Historical                 |
| TSA_DHW_freq_sum_day      | Historical                 |
| TSA_DHW_freq_mean_day     | Historical                 |
| TSA_DHW_freq_std_day      | Historical                 |
| TSA_DHW_minlength_day     | Historical                 |
| TSA_DHW_maxlength_day     | Historical                 |
| TSA_DHW_meanlength_day    | Historical                 |
| TSA_DHW_stdlength_day     | Historical                 |
| TSA_DHW_lastmax_DegC      | Historical                 |
| TSA_DHW_lastsum_DegC      | Historical                 |
| TSA_DHW_lastduration_day  | Historical                 |
| TSA_DHW_minrecovery_day   | Historical                 |
| TSA_DHW_maxrecovery_day   | Historical                 |
| TSA_DHW_meanrecovery_day  | Historical                 |
| TSA_DHW_lastrecovery_day  | Historical                 |
| TSA_cold_min_DegC         | Historical                 |
| TSA_cold_mean_DegC        | Historical                 |
| TSA_cold_std_DegC         | Historical                 |
| TSA_cold_freq_max_day     | Historical                 |
| TSA_cold_freq_sum_day     | Historical                 |
| TSA_cold_freq_mean_day    | Historical                 |
| TSA_cold_freq_std_day     | Historical                 |
| TSA_DCW_min_DegC          | Historical                 |
| TSA_DCW_sum_DegC          | Historical                 |

|                                  |            |
|----------------------------------|------------|
| TSA_DCW_mean_DegC                | Historical |
| TSA_DCW_std_DegC                 | Historical |
| TSA_DCW_freq_max_DegC            | Historical |
| TSA_DCW_freq_sum_day             | Historical |
| TSA_DCW_freq_mean_day            | Historical |
| TSA_DCW_freq_std_day             | Historical |
| TSA_DCW_minlenght_day            | Historical |
| TSA_DCW_maxlenght_day            | Historical |
| TSA_DCW_meanlenght_day           | Historical |
| TSA_DCW_stdlenght_day            | Historical |
| TSA_DCW_lastmin_DegC             | Historical |
| TSA_DCW_lastsum_DegC             | Historical |
| TSA_DCW_lasdduration_day         | Historical |
| TSA_DCW_minrecovery_day          | Historical |
| TSA_DCW_maxrecovery_day          | Historical |
| TSA_DCW_meanrecovery_day         | Historical |
| TSA_DCW_lastrecovery_day         | Historical |
| Moon_light_lux                   | Contextual |
| barometer_hp                     | Contextual |
| airTemp                          | Contextual |
| dewPoint                         | Contextual |
| Course_Over_Ground               | Contextual |
| Speed_over_Ground                | Contextual |
| apparent_windspeed_bow           | Contextual |
| apparent_winddir_bow             | Contextual |
| true_wind_speed                  | Contextual |
| true_wind_dir                    | Contextual |
| gamma_acs_final                  | Contextual |
| fCDOM_ppb                        | Contextual |
| PAR                              | Contextual |
| ssh_copernicus                   | Contextual |
| u_copernicus                     | Contextual |
| v_copernicus                     | Contextual |
| current_speed_copernicus         | Contextual |
| MLD_copernicus                   | Contextual |
| wavesignificantheight_copernicus | Contextual |
| windspeed_copernicus             | Contextual |
| eastward_wind_copernicus         | Contextual |
| orthward_wind_copernicus         | Contextual |
| o2_copernicus                    | Contextual |
| nppv_copernicus                  | Contextual |
| phyc_copernicus                  | Contextual |
| spco2_copernicus                 | Contextual |
| mergedPOC                        | Contextual |
| SST                              | Contextual |
| SSS                              | Contextual |
| chl                              | Contextual |
| daily_min_zenith                 | Contextual |
| Aerosols_conc                    | Contextual |
| PAR_Sat                          | Contextual |
| PIC_Sat                          | Contextual |
| bb_GSM_Sat                       | Contextual |
| KD490_Sat                        | Contextual |

|                  |            |
|------------------|------------|
| NO2__mole_L_     | Contextual |
| Proc_mL          | Contextual |
| Syn_mL           | Contextual |
| Pico_mL          | Contextual |
| Nano_mL          | Contextual |
| OrgNano_mL       | Contextual |
| TotalEuks_mL     | Contextual |
| CorrectedBact_mL | Contextual |
| corrected_AT     | Contextual |
| corrected_CT     | Contextual |
| NO3              | Contextual |
| PO4              | Contextual |
| SiOH             | Contextual |
| pH               | Contextual |
| MoonLength       | Contextual |
| SunLength        | Contextual |

**Supplementary Table 6: List of the historical and contextual environmental data used for the sPLS analysis.**
